# Supplementary material for: Clonal Selection of Autochthonous Grape Varieties in Badacsony, Hungary
Source: Preprints.org preprint supplement (doi:10.20944/preprints202306.2197.v1), 2023-06-30
Supplement: Supplementary file 1 [file supplementary]

## Sheet: 2011
Date	Temperature			Rainfall
	Max.	Min.	Mean
2011-01-01	-4	-6.2	-4.9775	0
2011-01-02	-0.2	-4.7	-3.15	0
2011-01-03	4.5	-7.2	-2.78417	0
2011-01-04	-4.5	-20	-6.07417	0
2011-01-05	-3.5	-5.7	-4.75	0
2011-01-06	3	-7	-2.52083	0
2011-01-07	12	2	6.34706	0
2011-01-08	10.8	2.8	7.92333	0
2011-01-09	11.8	4.3	6.89917	0
2011-01-10	5.5	-0.7	2.34417	0
2011-01-11	2	0	1.09583	0
2011-01-12	8.3	0	2.815	0
2011-01-13	5.3	-1	2.97	0
2011-01-14	9.8	3.3	6.28067	0
2011-01-15	12.5	0.3	6.6525	0
2011-01-16	11.8	1	7.05083	0
2011-01-17	9.3	-1.7	3.5625	0
2011-01-18	6.8	-3.2	0.0141667	0
2011-01-19	4	-4.7	-1.45917	0
2011-01-20	3	-0.5	1.56471	0
2011-01-21	1.5	-1.2	-0.085	0
2011-01-22	2.5	-3.7	-1.43	0
2011-01-23	3	-4.5	-1.3375	0
2011-01-24	3	-3.7	-1.41833	0
2011-01-25	0.3	-5.2	-2.0275	0
2011-01-26	6.5	-3.5	-0.00583333	0
2011-01-27	-1	-3	-1.84538	0
2011-01-28	2.3	-4.2	-2.0475	0
2011-01-29	2.3	-6.2	-3.39667	0
2011-01-30	-2	-6.7	-4.03583	0
2011-01-31	-2.2	-5	-3.525	0
2011-02-01	-4	-7	-5.16333	0
2011-02-02	2.8	-6	-3.12667	0
2011-02-03	0.5	-5.5	-2.86917	0
2011-02-04	6	-5	0.12605	0
2011-02-05	12	-2	4.06667	0
2011-02-06	13.3	-2.7	4.11667	0
2011-02-07	14.3	-2.2	4.9075	0
2011-02-08	14.5	-3.2	5.665	0
2011-02-09	9.5	0.5	5.535	0
2011-02-10	8	-3.7	0.965	0
2011-02-11	9.8	-4	3.73697	0
2011-02-12	6.8	-1.7	3.06167	0
2011-02-13	2	-1.5	-0.0916667	0
2011-02-14	0.5	-1.5	-0.395833	0
2011-02-15	-0.2	-2.5	-1.465	0
2011-02-16	2.3	-2.2	0.131667	0
2011-02-17	1.5	-1	0.3575	0
2011-02-18	2.8	0.5	1.54118	0
2011-02-19	7.3	0.5	3.12333	0
2011-02-20	3.5	-3	0.480833	0
2011-02-21	-2	-5.5	-4.27583	0
2011-02-22	-2	-6.7	-3.955	0
2011-02-23	-2	-9.5	-5.75167	0
2011-02-24	2	-10.5	-4.5525	0
2011-02-25	0.5	-8.7	-3.77143	0
2011-02-26	3.3	-4.5	-1.74417	0
2011-02-27	-1	-6	-2.78167	0
2011-02-28	3.5	-4.5	-0.919167	0
2011-03-01	2.3	-3.2	-0.661667	0
2011-03-02	2	-3.7	-1.5175	0
2011-03-03	1.3	-2.5	-0.731933	0
2011-03-04	5.8	-1.7	1.25917	0
2011-03-05	5.3	-4.7	-0.341667	0
2011-03-06	7.8	-3.5	1.9675	0
2011-03-07	5	-3.7	-0.101667	0
2011-03-08	5.3	-5	-0.102521	0
2011-03-09	8	-5	1.2875	0
2011-03-10	9.5	-2.7	3.325	0
2011-03-11	16.3	-1.5	6.695	0
2011-03-12	14.3	0.8	8.38083	0
2011-03-13	14.8	5.8	10.2767	0
2011-03-14	18.8	9.5	13.3208	0
2011-03-15	20.8	8.8	14.1258	0
2011-03-16	12.5	7.8	10.3817	0
2011-03-17	12.8	8.8	10.7433	1.6
2011-03-18	10	4.3	7.17983	0.4
2011-03-19	5.3	3.8	4.2875	0
2011-03-20	10.8	0.5	4.95417	0
2011-03-21	10	1.5	4.7575	0
2011-03-22	13.5	1.3	8.0175	0
2011-03-23	17.3	6.3	11.5225	0
2011-03-24	19.3	6.5	12.645	0
2011-03-25	21	4	12.7605	0
2011-03-26	20.8	6.3	12.485	1.2
2011-03-27	7.8	5	6.405	0.6
2011-03-28	11	4.3	7.26417	0
2011-03-29	18.3	3.8	9.97333	0
2011-03-30	18.3	3.5	11.0792	0
2011-03-31	19.8	4.8	12.56	0
2011-04-01	16.8	7.3	11.5807	0.8
2011-04-02	21.3	10.8	15.9767	0
2011-04-03	20	9	14.5983	0
2011-04-04	23.8	9.3	14.7392	1.6
2011-04-05	17.5	7.5	12.3483	0
2011-04-06	18.5	9.3	14.6442	0
2011-04-07	25.5	12	18.9608	0
2011-04-08	21.3	10.5	14.9992	0
2011-04-09	20	9	14.7342	0
2011-04-10	17	5.8	12.7175	0
2011-04-11	18.5	8	13.5108	0
2011-04-12	23	8.5	13.2017	1
2011-04-13	12.3	5	8.745	0.2
2011-04-14	9	4.8	6.72333	1.2
2011-04-15	14.3	4	8.77647	0
2011-04-16	15	6.8	10.3633	0
2011-04-17	17.3	5	11.6542	0
2011-04-18	19.3	6.3	13.4033	0
2011-04-19	20	7.3	14.8275	0
2011-04-20	21.5	9.3	16.0842	0
2011-04-21	24	9.8	17.1208	0
2011-04-22	25	11.8	18.0857	0
2011-04-23	25.5	11.5	18.3083	0
2011-04-24	22	14	17.3733	0
2011-04-25	20.5	12	15.5083	0
2011-04-26	19.5	10.5	14.6042	0
2011-04-27	19.5	9	14.7108	0
2011-04-28	19.3	12.3	15.32	0
2011-04-29	20	11	14.1672	2.2
2011-04-30	19.3	10.8	14.4517	0.4
2011-05-01	15.8	11	13.1342	0.4
2011-05-02	20	8.3	14.2683	0
2011-05-03	24.3	4.5	13.1983	0.8
2011-05-04	13.5	2.8	8.21	0
2011-05-05	15.3	5.8	10.385	0
2011-05-06	18	4.8	11.8437	0
2011-05-07	22.8	7	15.1933	0
2011-05-08	15.3	6	10.1092	4.8
2011-05-09	20.5	6.8	15.5058	0
2011-05-10	24.3	10.8	18.995	0
2011-05-11	25.3	14.3	20.4608	0
2011-05-12	25.8	11.5	19.64	0
2011-05-13	25	14	19.663	0
2011-05-14	26	13.5	19.4917	0
2011-05-15	16	10.5	12.4083	1.4
2011-05-16	19	9.8	13.8075	0
2011-05-17	22	11.3	16.6208	0
2011-05-18	25.5	11.3	18.9783	0
2011-05-19	28.5	12.8	20.6033	0
2011-05-20	29.5	13.8	22.1647	0
2011-05-21	29.8	15.5	22.2867	0
2011-05-22	28.8	15	20.9992	0
2011-05-23	29.3	15.3	23.8283	0
2011-05-24	29.8	16	23.1392	0
2011-05-25	25.8	14	20.5358	0
2011-05-26	28.8	13.5	20.9608	0
2011-05-27	31	12.8	22.9622	0.8
2011-05-28	16.3	10.8	12.65	2.8
2011-05-29	24.8	9.3	17.5892	0
2011-05-30	28.8	11.8	21.1267	0
2011-05-31	30.8	16.8	22.9883	0
2011-06-01	27.3	15.5	20.9175	3.4
2011-06-02	25.3	16.5	20.2575	0
2011-06-03	29.5	16.5	22.9756	0
2011-06-04	30	18.5	23.7742	0
2011-06-05	31.3	16	23.4483	0.6
2011-06-06	29.5	16	23.0392	1.2
2011-06-07	31	18.3	24.7367	2.2
2011-06-08	27	17.8	22.4717	0
2011-06-09	19.3	14.5	16.8908	1.2
2011-06-10	24.3	13.5	18.8092	0
2011-06-11	27	12.8	20.9571	0
2011-06-12	27.5	16	21.5542	0
2011-06-13	28.8	15.8	22.725	0
2011-06-14	29	16.5	21.88	0
2011-06-15	28.8	17.3	22.7308	0
2011-06-16	30.8	15.8	24.3275	0
2011-06-17	29.3	16.5	23.9067	0
2011-06-18	30.5	14.5	24.0742	0.4
2011-06-19	18.3	10.5	13.3833	2.6
2011-06-20	25.8	10	18.4533	0
2011-06-21	31	13	22.8083	0
2011-06-22	32.3	15.8	25.4083	0
2011-06-23	32.3	17.3	25.16	0
2011-06-24	24	14.5	17.3756	2.6
2011-06-25	23.3	13	17.92	0
2011-06-26	23	13.8	17.415	0
2011-06-27	28.5	15.8	21.6225	0
2011-06-28	28	17.5	23.0267	0
2011-06-29	30.8	18.3	22.5883	6.4
2011-06-30	31.3	16	23.2767	0
2011-07-01	25.3	13.8	18.8319	0
2011-07-02	23.3	10.3	15.3367	2.8
2011-07-03	23.8	10.3	16.6375	0
2011-07-04	27.5	14.8	20.2583	0
2011-07-05	27.3	17.8	21.3375	0
2011-07-06	29.8	17.8	23.4658	0
2011-07-07	34.3	16.5	26.2608	0
2011-07-08	35.5	19.5	27.1717	0
2011-07-09	36.5	20.3	28.9118	0
2011-07-10	37	21.5	29.8417	0
2011-07-11	33.3	20.5	26.6758	0
2011-07-12	34.8	20.8	26.5333	0
2011-07-13	35.5	21.3	28.24	0
2011-07-14	35.8	18.5	27.4067	0
2011-07-15	26.8	17.3	20.8235	0
2011-07-16	30	17.3	23.1592	0
2011-07-17	32.3	16.3	25.53	0
2011-07-18	31.5	18.3	23.1417	0.2
2011-07-19	32.5	15.8	22.8808	6.8
2011-07-20	25.5	14.5	17.9158	17
2011-07-21	25.3	14	17.4858	5.8
2011-07-22	26.8	13.8	19.6034	0.6
2011-07-23	22.3	14.5	17.9833	2.2
2011-07-24	19.5	13.5	15.9842	0.8
2011-07-25	16.8	12	14.2833	0.4
2011-07-26	18.5	14	16.2392	0
2011-07-27	29.3	15.3	21.2933	0
2011-07-28	20	15.3	17.315	26
2011-07-29	25	15.3	18.7185	7.8
2011-07-30	26	15	18.9833	1.2
2011-07-31	25.3	15.3	18.6225	0
2011-08-01	24.8	13.8	18.8408	0
2011-08-02	29	17.5	22.7825	0
2011-08-03	30.5	15.8	23.9608	0
2011-08-04	22.3	16.3	18.5558	16.8
2011-08-05	30	16.8	22.6725	0
2011-08-06	29.8	17.3	23.5158	0
2011-08-07	31.5	17.8	24.265	0
2011-08-08	31.3	15.3	20.9792	1.2
2011-08-09	25	14.5	19.2425	0.2
2011-08-10	23.8	13.8	17.7134	0
2011-08-11	25.8	10.8	18.89	0
2011-08-12	29.3	12.3	21.295	0
2011-08-13	31.3	16.3	22.3567	0
2011-08-14	31	15.8	24.075	0
2011-08-15	33	17	24.9175	17.6
2011-08-16	27.8	16.5	22.1458	0.2
2011-08-17	30.5	15.5	23.2317	0
2011-08-18	31.5	17.8	25.2033	0
2011-08-19	34.5	18.3	24.8403	6.2
2011-08-20	30.3	19.5	24.7742	0
2011-08-21	30.3	19.3	24.37	0
2011-08-22	33.8	19	26.925	0
2011-08-23	35.8	20.3	28.385	0
2011-08-24	36.3	22.3	28.9983	0
2011-08-25	34.5	22.3	28.185	0
2011-08-26	37.3	20.5	29.1731	0
2011-08-27	33.5	14	25.0833	0
2011-08-28	25	14	19.1833	0
2011-08-29	28.3	13.8	21.515	0
2011-08-30	29.3	17.5	22.9517	0
2011-08-31	28	15	21.9808	0
2011-09-01	31	17	22.6683	6.4
2011-09-02	28.5	14.8	22.6765	0
2011-09-03	30.8	16.8	24.1283	0
2011-09-04	33.3	18.8	26.1133	0
2011-09-05	32.8	17.5	24.5767	0
2011-09-06	26.3	14.3	20.3883	0.2
2011-09-07	28.8	12.3	20.5875	0
2011-09-08	21	-20	16.1542	0
2011-09-09	20.8	-20	16.5361	0
2011-09-10	31	15.3	23.3592	0
2011-09-11	33	16.8	24.9108	0
2011-09-12	31.3	16.5	24.0367	0
2011-09-13	31.5	15.5	23.845	0
2011-09-14	32.8	16.3	23.2958	0
2011-09-15	26.8	14	19.65	0
2011-09-16	26.5	13.3	19.9092	0
2011-09-17	28.8	15.8	21.6158	0
2011-09-18	29.3	14.8	22.505	0
2011-09-19	25.3	10	14.7567	5
2011-09-20	16	10.5	12.7167	0
2011-09-21	23.3	12.8	17.74	0
2011-09-22	26.5	11.5	18.9731	0
2011-09-23	26	12.8	18.9942	0
2011-09-24	25.8	11.8	17.8292	0
2011-09-25	24.3	13.3	18.1608	0
2011-09-26	25.8	13.8	19.185	0
2011-09-27	29	11.8	19.7471	0
2011-09-28	28	12.3	20.2633	0
2011-09-29	25	13.5	19.6425	0
2011-09-30	27.5	12.5	20.0092	0
2011-10-01	27	11	20.0525	0
2011-10-02	28	14	20.985	0
2011-10-03	25.5	11.3	17.8433	0
2011-10-04	29.3	9.8	18.3875	0
2011-10-05	28.3	11.8	19.8508	0
2011-10-06	26.3	12.8	18.5933	0
2011-10-07	16	5	9.54706	11.4
2011-10-08	14.5	3.5	8.01667	0
2011-10-09	14.3	3.8	8.29	0
2011-10-10	14.3	4.8	9.58333	0
2011-10-11	20.5	8.3	13.47	0
2011-10-12	23.5	9.3	13.7517	0.8
2011-10-13	17	6.8	10.56	0.2
2011-10-14	14.5	2.5	7.71008	0
2011-10-15	14	-0.2	7.61917	0
2011-10-16	12.8	1	6.83083	0
2011-10-17	14.3	0	6.1375	0
2011-10-18	16.5	-1	7.28917	0
2011-10-19	20.3	1.8	11.9492	0
2011-10-20	10.8	4.8	6.78319	13
2011-10-21	12	2.8	7.59	0
2011-10-22	13.5	1	7.07833	0.2
2011-10-23	8.8	6.3	7.255	3.8
2011-10-24	9.8	7.5	8.71917	3.8
2011-10-25	10	7.5	8.825	1.4
2011-10-26	13.8	7.3	9.84583	0
2011-10-27	12.5	8.3	10.0892	0
2011-10-28	13.3	7	9.08167	0
2011-10-29	11	6.5	9.26833	0
2011-10-30	15	3.5	8.63193	0
2011-10-31	16.3	2.5	6.98833	0
2011-11-01	12.5	3	5.9625	0.2
2011-11-02	7.8	3.8	5.045	0.2
2011-11-03	8	4.5	5.90168	0.2
2011-11-04	17.3	3	8.57	0
2011-11-05	21	8.5	13.48	0
2011-11-06	12.3	5.5	9.02083	0
2011-11-07	11.8	6.5	8.3775	0
2011-11-08	13.3	5.3	8.705	0
2011-11-09	15.3	4.3	7.90083	0
2011-11-10	9.5	4.3	6.27083	0
2011-11-11	6.3	1	3.46303	0
2011-11-12	9.5	-1.2	3.30667	0
2011-11-13	10.3	-3.2	2.72333	0
2011-11-14	10.5	-3.2	2.14333	0
2011-11-15	10.5	-1.7	2.81333	0
2011-11-16	2.8	-3.2	-0.855833	0
2011-11-17	-0.5	-2	-1.1625	0
2011-11-18	-0.7	-3.2	-1.83109	0
2011-11-19	-0.7	-2.2	-1.5075	0.2
2011-11-20	-2.2	-3	-2.57333	0
2011-11-21	-3	-4.2	-3.57917	0
2011-11-22	-1.5	-4.2	-3.23583	0
2011-11-23	0	-2	-1.3325	0
2011-11-24	-1	-2.5	-1.72353	0
2011-11-25	0.5	-2.2	-0.82	0
2011-11-26	1.5	-1	0.228333	9.6
2011-11-27	1	-0.7	0.136667	0
2011-11-28	12.5	-2.5	2.60917	0
2011-11-29	0.3	-3	-1.63583	0
2011-11-30	-0.7	-3	-1.86417	0
2011-12-01	-1.2	-3.2	-2.12689	0
2011-12-02	-0.2	-2.2	-1.16917	0
2011-12-03	1.5	-1.2	0.289167	0.4
2011-12-04	11.8	0	5.9675	0.2
2011-12-05	12.3	4.8	8.34667	3
2011-12-06	7.3	1.3	3.40333	0
2011-12-07	4.5	-20	-0.586667	0
2011-12-08	11.3	0.3	5.34	0
2011-12-09	8.5	-1	4.86218	0
2011-12-10	10.8	4.3	7.685	0
2011-12-11	8	3.5	5.335	0
2011-12-12	8	2.5	5.22083	0
2011-12-13	9.8	3.3	5.43083	0
2011-12-14	11.3	1.8	6.15294	0
2011-12-15	10.5	4	5.34333	0
2011-12-16	11	0	5.74167	0
2011-12-17	6.3	0.8	3.94167	0
2011-12-18	9.8	-1.5	2.615	0
2011-12-19	3	-0.2	1.39664	0
2011-12-20	4.8	-3.5	-0.2525	0
2011-12-21	1.3	-4.7	-1.83917	0
2011-12-22	6.3	-2.5	1.62583	0
2011-12-23	1.3	-4.2	-0.928333	0
2011-12-24	5.5	-0.7	1.59	0
2011-12-25	8	1.3	4.17333	0
2011-12-26	3.5	1.5	2.615	0
2011-12-27	3.8	1.8	2.69583	0
2011-12-28	2.8	-0.7	1.34417	0
2011-12-29	0.8	-1.5	-0.585	0
2011-12-30	1.8	-1.7	-0.108333	0
2011-12-31	5.8	-3.2	0.370833	0

## Sheet: 2012
Date	Temperature			Rainfall
	Max.	Min.	Mean
2012-01-01	4.3	-2	1.20583	0
2012-01-02	9.5	0.1	3.64333	0
2012-01-03	9.3	3.5	5.97167	0
2012-01-04	13	2	5.4425	0
2012-01-05	5.8	0.5	3.635	0
2012-01-06	8.3	1	4.25882	0
2012-01-07	7.5	-0.2	3.07833	0
2012-01-08	9	1.3	3.9575	0
2012-01-09	6.8	0.5	3.59167	0
2012-01-10	8.8	0.3	3.82583	0
2012-01-11	8.3	1.8	4.5375	0
2012-01-12	10	0.5	4.4725	0
2012-01-13	10.5	-0.7	3.9916	0
2012-01-14	6.5	-0.7	1.92333	0
2012-01-15	3.8	-2.5	-0.5625	0
2012-01-16	3.8	-3.5	-0.915	0
2012-01-17	3.5	-2.5	-0.135	0
2012-01-18	8	-0.5	2.15583	0
2012-01-19	5.3	-1.2	2.34667	0
2012-01-20	6.5	0.3	3.72941	0
2012-01-21	8.3	-1.2	2.64167	0
2012-01-22	12	2.5	6.13417	0
2012-01-23	11.8	0.5	5.6875	0
2012-01-24	5.3	0.8	2.805	0
2012-01-25	5	-2.5	0.0866667	0
2012-01-26	2.5	-4.2	-1.69833	0
2012-01-27	2.5	-5.2	-1.85042	0
2012-01-28	1.5	-5	-2.43583	0
2012-01-29	-0.5	-5	-3.15083	0
2012-01-30	-0.2	-7	-3.94083	0
2012-01-31	-2.7	-9	-5.5975	0
2012-02-01	-2.2	-8.2	-5.63333	0
2012-02-02	-5	-11.5	-8.32857	0
2012-02-03	-8.7	-12.2	-10.4217	0
2012-02-04	-10.5	-12.7	-12.05	0
2012-02-05	-6.5	-13	-10.71	0
2012-02-06	-11	-13.2	-12.0633	0
2012-02-07	-9	-12.5	-10.7158	0
2012-02-08	-2.2	-13.2	-8.17083	0
2012-02-09	-3.7	-13	-8.375	0
2012-02-10	-5.2	-12.7	-9.62437	0
2012-02-11	-7.5	-13.7	-10.1033	0
2012-02-12	-6.2	-9.7	-8.17083	0
2012-02-13	-0.7	-8.5	-5.26583	0
2012-02-14	1	-6.2	-3.12667	0
2012-02-15	3.3	-5.5	-1.60672	0
2012-02-16	3.5	-2.2	0.784167	0
2012-02-17	4	-3.5	0.209167	0
2012-02-18	9.8	1	3.55167	0
2012-02-19	9.8	-1.2	4.185	0
2012-02-20	6.5	1	3.28333	0
2012-02-21	7	-4.2	1.17333	0
2012-02-22	7.8	-6	0.23	0
2012-02-23	8.3	-3.2	2.44833	0
2012-02-24	16.3	3.3	10.0538	0
2012-02-25	17	4.8	11.0517	0
2012-02-26	10.5	0	5.48667	0
2012-02-27	6.3	-3.2	1.73333	0
2012-02-28	1.5	-1	0.395	0
2012-02-29	13.8	1.5	9.19	0
2012-03-01	13.5	5.8	9.2475	0
2012-03-02	17.5	5	10.7924	0
2012-03-03	11.5	1.8	5.87	0
2012-03-04	8.3	-0.2	4.3225	0
2012-03-05	8.5	0.3	3.82333	0
2012-03-06	9.3	-1.2	3.46583	0
2012-03-07	5.5	-3.7	0.490833	0
2012-03-08	6.8	-1.7	2.455	0
2012-03-09	11	2	5.35546	0
2012-03-10	11	-0.7	5.63583	0
2012-03-11	9.3	0	5.15833	0
2012-03-12	9.3	4.3	6.63917	0
2012-03-13	11.5	6.3	8.61917	0
2012-03-14	13.5	4.8	8.09664	0
2012-03-15	14.8	3.8	9.07417	0
2012-03-16	18.3	0.8	10.0725	0
2012-03-17	21.5	4.8	13.3433	0
2012-03-18	17.5	8	12.88	0
2012-03-19	18	8.3	12.4158	0
2012-03-20	15.3	5.8	10.2008	0
2012-03-21	18.5	4	11.515	0
2012-03-22	19.5	4.3	12.34	0
2012-03-23	21.8	7.5	14.6815	0
2012-03-24	22	7.8	15.5767	0
2012-03-25	22.3	11.5	16.1567	0
2012-03-26	16.3	6.5	11.65	0
2012-03-27	19	4	12.6833	0
2012-03-28	21.3	9	14.9375	0
2012-03-29	19.3	7.5	12.4817	0
2012-03-30	10.5	7	9.07227	0
2012-03-31	20.5	4.3	11.9908	0
2012-04-01	10.3	1.5	5.30083	0
2012-04-02	16.8	0.8	9.46583	0
2012-04-03	19.8	8	13.6975	0
2012-04-04	22.5	9.8	16.1361	0
2012-04-05	24.8	10.5	17.2217	0.2
2012-04-06	14.3	7.8	10.8483	1.6
2012-04-07	16.5	5.8	9.47333	9.4
2012-04-08	8.8	-0.2	4.39333	0
2012-04-09	9.3	-2	3.91583	0
2012-04-10	14	-0.2	7.85083	0
2012-04-11	16.3	7	11.7092	0
2012-04-12	12.3	6.8	9.20417	5.6
2012-04-13	17.3	4.8	11.2092	0
2012-04-14	14.5	9.3	11.29	0
2012-04-15	16.5	8.3	11.8483	0
2012-04-16	14.5	5	9.4375	0
2012-04-17	13.3	4	7.98333	0
2012-04-18	14	5	9.92167	0
2012-04-19	17.5	8	12.0892	0
2012-04-20	19.8	6.5	13.0966	0
2012-04-21	18	8	12.735	0
2012-04-22	19	6.8	10.5067	7.8
2012-04-23	16	5.5	10.89	0
2012-04-24	18.5	7.3	12.3342	1.8
2012-04-25	18	9.3	13.2075	0.2
2012-04-26	22.5	9.3	16.1675	0
2012-04-27	23.8	9.5	17.6286	0
2012-04-28	28	15	22.1008	0
2012-04-29	29	17.3	22.8917	0
2012-04-30	30.8	14.5	22.5942	0
2012-05-01	31.3	16.3	23.8092	0
2012-05-02	31	16.3	23.855	0
2012-05-03	25.8	15.5	21.0517	0.6
2012-05-04	20.3	12.5	15.979	5.2
2012-05-05	24	12.3	18.5925	0
2012-05-06	23.8	13.3	18.6242	0
2012-05-07	16.5	12	13.5667	10.2
2012-05-08	22.5	10.3	15.825	0
2012-05-09	26.5	11.3	18.0983	0
2012-05-10	27	12.3	20.0117	0
2012-05-11	29.3	13	21.3882	0
2012-05-12	29.3	9	18.7342	3.6
2012-05-13	15.3	7.5	11.1775	2.8
2012-05-14	13.5	7.3	10.4433	0
2012-05-15	17.5	10	13.4275	0
2012-05-16	16.8	8.8	12.1825	0
2012-05-17	17	7	11.8933	0
2012-05-18	20	6	12.9714	0
2012-05-19	24.3	7.8	16.9425	0
2012-05-20	26.5	11.3	20.1408	0
2012-05-21	25.8	15.8	20.335	0
2012-05-22	18.8	13.5	16.4533	18.8
2012-05-23	28	14.3	20.385	0.6
2012-05-24	28	15.5	20.625	3.6
2012-05-25	23.8	13.8	17.6697	0.2
2012-05-26	23.5	13.3	17.8858	0
2012-05-27	23.3	12.3	17.3242	0.2
2012-05-28	23.5	11.8	16.8275	0.2
2012-05-29	24	12.8	17.6925	0
2012-05-30	28.5	14.3	19.79	2
2012-05-31	26.5	13	19.1467	0
2012-06-01	25.3	14.8	18.8286	2
2012-06-02	22.8	12.8	18.0883	0.4
2012-06-03	28.5	16	22.8067	0
2012-06-04	29.5	13.8	20.3967	0.8
2012-06-05	23	10.3	15.42	2
2012-06-06	22.8	9.3	16.4833	0
2012-06-07	28	13.5	21.7342	0
2012-06-08	31	16.5	24.3294	0
2012-06-09	27.8	15	20.57	15.4
2012-06-10	25.8	15	20.1275	0
2012-06-11	23.8	13.8	17.9975	1.4
2012-06-12	20	14.8	16.4775	5.8
2012-06-13	23.8	12.8	17.2642	0
2012-06-14	26	13	19.1733	3.4
2012-06-15	30	14	22.1882	0
2012-06-16	30.3	16.3	24.3492	0
2012-06-17	33.5	19	26.7175	0
2012-06-18	33.3	20	27.3692	0
2012-06-19	35.5	19.3	27.8617	0
2012-06-20	34.5	20.8	28.5367	0
2012-06-21	36.3	18.5	28.135	18.8
2012-06-22	30.3	20	24.6798	0
2012-06-23	29.3	18.5	24.0975	0
2012-06-24	32.3	16.5	25.4958	0
2012-06-25	23	14	18.5033	13
2012-06-26	26	14	20.035	0
2012-06-27	29.3	15.8	21.8076	0
2012-06-28	32.3	15.8	24.6558	0
2012-06-29	33.8	20.5	26.5633	0
2012-06-30	36.3	21.8	29.5392	0
2012-07-01	38.3	23.3	31.1125	0
2012-07-02	37.3	22.3	30.1825	0
2012-07-03	37	24.5	30.4733	0
2012-07-04	36.3	20.3	29.3875	0.2
2012-07-05	38	23	29.7333	0
2012-07-06	38	21.8	29.0277	0.2
2012-07-07	37.3	21.3	28.7483	0
2012-07-08	34.5	22.3	28.7175	0
2012-07-09	34.8	22.3	28.1683	0
2012-07-10	33.8	20.3	26.1867	0
2012-07-11	34	17.3	24.395	9.8
2012-07-12	28.3	16.8	21.8118	1.2
2012-07-13	25.8	12.8	19.2658	0
2012-07-14	32.5	12.5	21.5825	4.6
2012-07-15	21.3	13	16.8725	5
2012-07-16	25.8	12.5	18.5192	0.2
2012-07-17	27	11.8	20.4833	0
2012-07-18	30	15	22.5792	0
2012-07-19	33	15	25.34	0
2012-07-20	29.5	17.8	23.7966	0.2
2012-07-21	24	14.5	17.7383	1.6
2012-07-22	26	14.3	18.7133	0
2012-07-23	29	13.5	22.1525	0
2012-07-24	30.3	17	22.265	2.8
2012-07-25	29.3	18	22.9992	0
2012-07-26	30.3	19.3	22.8967	6.2
2012-07-27	33.5	20	25.837	0
2012-07-28	34.8	19	27.9992	0
2012-07-29	36.8	18	25.0117	0
2012-07-30	29.5	19	23.6675	0
2012-07-31	30.3	18.8	23.3458	0
2012-08-01	33.3	20.8	27.02	0
2012-08-02	35.5	20.5	27.9158	0
2012-08-03	37.3	22	27.7317	0
2012-08-04	34.8	19.5	27.8058	0
2012-08-05	38.5	20.8	30.2353	0
2012-08-06	37.5	21.5	30.2	0
2012-08-07	29.8	18.3	24.42	0
2012-08-08	29.8	18.5	23.4992	0
2012-08-09	31.8	19.3	23.2433	0.2
2012-08-10	30.5	17.8	23.0467	0
2012-08-11	23.3	12.3	17.3067	0.8
2012-08-12	26	11.5	18.9033	0
2012-08-13	27.3	12.8	20.87	0
2012-08-14	27.3	14.5	20.8608	0
2012-08-15	31.8	13	23.1033	0
2012-08-16	34	17.3	25.2808	0
2012-08-17	31.8	20	25.3815	0
2012-08-18	30.8	18	24.8283	0
2012-08-19	34.3	18	26.0292	0
2012-08-20	37	16	26.8842	0
2012-08-21	37.8	18	27.6825	0
2012-08-22	38.8	19	29.5275	0
2012-08-23	36	22	28.4208	0
2012-08-24	38.3	21	29.4277	0
2012-08-25	35.8	22	28.9542	0
2012-08-26	28.8	14	20.27	2
2012-08-27	26.5	14.5	20.2642	0
2012-08-28	29.5	13	21.7308	0
2012-08-29	32.5	14.5	23.6058	0
2012-08-30	34.8	15.3	25.0242	0
2012-08-31	29.8	14.3	20.7294	0
2012-09-01	19.5	14.3	16.6558	0.6
2012-09-02	27.3	16	21.3392	0
2012-09-03	34	16.3	24.6842	0
2012-09-04	29	18	22.9217	0
2012-09-05	31.8	16	24.3513	0
2012-09-06	26.5	11.8	19.8708	0.2
2012-09-07	24.8	12.3	19.3325	0
2012-09-08	29.8	13.8	22.2742	0
2012-09-09	33	13.8	23.6475	0
2012-09-10	31.8	17.5	24.1633	0
2012-09-11	31.8	18	24.0117	0
2012-09-12	31.3	11.8	21.0092	1.8
2012-09-13	11.5	8.8	9.91333	15.2
2012-09-14	16	10	13.1731	2.2
2012-09-15	24.5	13.5	17.3433	0
2012-09-16	23.3	12.3	17.5342	0
2012-09-17	24.5	13	17.485	0
2012-09-18	28.8	12.8	19.7742	0
2012-09-19	26.8	9.8	16.2667	2.8
2012-09-20	20	10	13.65	1
2012-09-21	22.5	6.5	14.0717	0
2012-09-22	24.3	7.3	16.4608	0
2012-09-23	24	12	16.6	0
2012-09-24	26.3	12.8	19.7775	2.8
2012-09-25	27.5	13.3	19.5092	10.4
2012-09-26	27.8	14	21.3175	0
2012-09-27	27.5	14	19.3168	0
2012-09-28	25.5	12	17.2567	0
2012-09-29	24.8	12.3	18.175	0
2012-09-30	23.3	14	17.63	0
2012-10-01	26.3	16.3	18.9725	0
2012-10-02	17.5	10.8	15.1217	7.6
2012-10-03	24	10	15.8308	0
2012-10-04	27.3	9.3	17.4748	0
2012-10-05	22	10.3	15.6267	0
2012-10-06	26.8	8.8	17.5275	0
2012-10-07	25.3	6.5	14.4075	0.8
2012-10-08	18.8	5	10.9092	0
2012-10-09	19.3	3.8	11.6117	0
2012-10-10	11.8	6.5	8.865	3.4
2012-10-11	17.3	5.3	10.5183	0
2012-10-12	14.3	8.5	11.9521	0
2012-10-13	16.8	9.5	12.71	0
2012-10-14	15.5	9.5	12.515	0
2012-10-15	24.3	8.8	14.7717	4.4
2012-10-16	9.3	6.8	8.0675	17.4
2012-10-17	18.8	6	11.3042	0
2012-10-18	24.3	10.3	15.7842	0
2012-10-19	24	9.8	15.5242	0
2012-10-20	25.3	7.8	13.8367	0
2012-10-21	19.3	7.3	12.8767	0.2
2012-10-22	22.3	7.8	13.8892	0
2012-10-23	19	6.5	10.5267	0
2012-10-24	11.5	8	9.34583	0
2012-10-25	10.8	5	8.50583	0
2012-10-26	11	5.8	9.18151	0.4
2012-10-27	20.3	1	10.1933	28.2
2012-10-28	4	0.5	2.12167	3.6
2012-10-29	4	-1.2	0.414167	9.2
2012-10-30	10.3	-2.2	3.02167	0
2012-10-31	15.5	-2.2	6.28571	0
2012-11-01	11	4	7.225	4
2012-11-02	14.8	2.5	7.0675	1
2012-11-03	19	1.8	10.0225	0.2
2012-11-04	20.5	9.3	14.3067	0
2012-11-05	16.5	5.3	8.95333	15.4
2012-11-06	8.5	3.3	5.95833	0
2012-11-07	11	0.5	6.7425	0
2012-11-08	17.8	2.3	8.87417	0
2012-11-09	16.5	2.3	7.37647	0
2012-11-10	12.5	4	6.61083	0
2012-11-11	13.5	4.8	8.75167	0
2012-11-12	10.3	8	8.86583	2.6
2012-11-13	13	4.8	9.64917	0
2012-11-14	14.3	3.5	7.57667	0
2012-11-15	8.5	2.3	5.02167	0
2012-11-16	8.8	4.3	6.52521	0
2012-11-17	9.3	4.8	6.65083	0
2012-11-18	8	5.3	6.7075	0.4
2012-11-19	10.8	5.3	6.99	1
2012-11-20	7.5	4	5.95167	0
2012-11-21	9	6	7.28917	0
2012-11-22	9.3	6.3	7.01333	0
2012-11-23	8	5.8	6.79244	1.2
2012-11-24	10.3	5.8	7.57583	0
2012-11-25	9.3	5.3	6.84333	0
2012-11-26	11	5.5	8.11083	0
2012-11-27	15.5	8.8	11.7842	0
2012-11-28	15.8	8.8	11.3408	3.6
2012-11-29	15.3	3.3	9.24583	15.4
2012-11-30	5.3	3	4.23025	0
2012-12-01	9	-0.7	3.5	0
2012-12-02	3	-0.7	1.08833	2
2012-12-03	4.5	-1.5	1.25833	2.2
2012-12-04	2.8	-1.7	0.275833	3.4
2012-12-05	5.5	-1	1.74667	0
2012-12-06	0.5	-2	-1.13529	0
2012-12-07	2	-4.7	-1.50083	0
2012-12-08	-2.5	-4.5	-3.4375	0
2012-12-09	1.8	-5.7	-3.08	0
2012-12-10	0.5	-6.2	-3.63167	0
2012-12-11	1	-7	-3.31513	0
2012-12-12	0.8	-7.2	-3.50333	0
2012-12-13	0	-10	-4.38917	0
2012-12-14	5.3	-2.2	1.8775	0
2012-12-15	6.8	0.5	4.285	0
2012-12-16	3	0	1.0575	0
2012-12-17	2	-0.5	0.880833	0
2012-12-18	2.8	0	1.44	0
2012-12-19	3.5	1.5	2.82	0
2012-12-20	5	-2.7	0.736134	0
2012-12-21	-0.5	-2.2	-1.32917	0
2012-12-22	0.5	-1.7	-0.825833	0
2012-12-23	0	-2.7	-1.09583	0
2012-12-24	9.5	-1	2.70083	0
2012-12-25	11.8	-0.7	5.96583	0
2012-12-26	10.5	3.3	6.30917	0
2012-12-27	9.8	1.8	5.14	0
2012-12-28	9	-2.5	3.89333	0
2012-12-29	4.5	-4	-0.2475	0
2012-12-30	3.8	-3.7	-1.09083	0
2012-12-31	4.8	-5	-1.185	0

## Sheet: 2013
Date	Temperature			Rainfall
	Max.	Min.	Mean
2013-01-01	-1.2	-3.5	-2.55667	0
2013-01-02	0.3	-2.3	-3.06917	0
2013-01-03	5.8	-2	2.01849	0
2013-01-04	13	1.8	5.8825	0
2013-01-05	11.3	3	7.0875	0
2013-01-06	5	1.5	2.72167	0
2013-01-07	5.5	-2.2	1.43833	0
2013-01-08	-1	-3.7	-2.34167	0
2013-01-09	6	-1	0.638333	0
2013-01-10	1.5	-1	0.155833	0
2013-01-11	5.8	-2.2	1.10672	0
2013-01-12	2	-5.2	-1.525	0
2013-01-13	-1.5	-3.2	-2.2975	0
2013-01-14	-0.5	-3.2	-1.82333	0
2013-01-15	0	-2	-0.873333	0
2013-01-16	1	-1.5	-0.301667	0
2013-01-17	-1	-2.7	-1.80083	0
2013-01-18	-2.7	-5	-4.37143	0
2013-01-19	-0.2	-4.7	-3.35167	0
2013-01-20	2.8	-2	0.673333	0
2013-01-21	3.5	0.3	1.3275	0
2013-01-22	1	-1.5	-0.1675	0
2013-01-23	0.5	-2	-0.46	0
2013-01-24	1.8	-1.5	0.1925	0
2013-01-25	-1.5	-7	-4.48571	0
2013-01-26	0	-8	-5.50417	0
2013-01-27	-1.2	-10	-5.08667	0
2013-01-28	0.3	-2.7	-1.54333	0
2013-01-29	2.8	-8.2	-1.27583	0
2013-01-30	9	0.8	3.83667	0
2013-01-31	12.3	2.5	6.6025	0
2013-02-01	7.8	1	4.95462	0
2013-02-02	7.8	3	5.45917	0
2013-02-03	4.3	-1.2	1.44	0
2013-02-04	4.5	-2.2	1.5725	0
2013-02-05	6	0.5	3.86667	0
2013-02-06	5	-0.5	2.08	0
2013-02-07	5.8	-0.7	1.75917	0
2013-02-08	4.8	-1.5	0.423529	0
2013-02-09	0.8	-3	-1.62083	0
2013-02-10	-1.7	-6.5	-2.98167	0
2013-02-11	2	-7	-2.18	0
2013-02-12	0.8	-3.5	-1.21833	0
2013-02-13	0	-1	-0.804167	0
2013-02-14	0.5	-1	-0.458333	0
2013-02-15	4.3	-1	0.583193	0
2013-02-16	5.8	-1.2	1.97583	0
2013-02-17	2.3	-2.5	0.4625	0
2013-02-18	4.5	-1.2	1.26083	0
2013-02-19	6.5	-1.5	1.51917	0
2013-02-20	4.8	-1.5	1.2325	0
2013-02-21	3	-3.7	-1.27417	0
2013-02-22	-1.5	-4.5	-3.03782	0
2013-02-23	2.5	-2.5	-0.0708333	0
2013-02-24	7.3	2.3	4.91583	0
2013-02-25	7.5	1.8	4.23583	0
2013-02-26	6.3	1.8	4.8675	0
2013-02-27	4	1	2.68	0
2013-02-28	8.8	2	4.87833	0
2013-03-01	4.5	-0.5	1.96555	0
2013-03-02	8	-1.2	2.9025	0
2013-03-03	11.3	-3.2	3.02583	0
2013-03-04	7.3	0.3	3.25583	0
2013-03-05	11.3	0.3	5.69167	0
2013-03-06	13	2.8	8.00333	0
2013-03-07	16.3	8.3	11.29	0
2013-03-08	19	6.8	11.9647	0
2013-03-09	13.8	5.5	9.61917	0
2013-03-10	9.5	5.8	8.40667	0
2013-03-11	13	1.5	7.24417	0
2013-03-12	11.5	2.8	6.795	0
2013-03-13	10.8	4.8	7.66167	0
2013-03-14	3.8	-5	-2.33529	0
2013-03-15	1.3	-5.5	-2.08667	0
2013-03-16	4	-5.5	-1.21583	0
2013-03-17	2.5	-4.5	-0.409167	0
2013-03-18	3.8	-20	1.13333	0
2013-03-19	12.8	4	7.30833	0
2013-03-20	14.3	1.3	8.34833	0
2013-03-21	9.3	1	5.83333	0
2013-03-22	6.8	-2.5	1.93866	0
2013-03-23	2.5	-3.5	-0.205833	0
2013-03-24	0.3	-5	-2.36	0
2013-03-25	-2	-3.7	-2.6825	0
2013-03-26	-2	-3.7	-2.835	0
2013-03-27	3.5	-4.2	-1.11	0
2013-03-28	5.3	-4	0.798319	0
2013-03-29	2.5	0.3	1.155	0
2013-03-30	5.5	1.3	3.27667	0
2013-03-31	5.8	-0.2	2.06417	0
2013-04-01	5.8	-0.5	2.44	0
2013-04-02	3	0	1.62333	0
2013-04-03	1.8	0	0.773333	0
2013-04-04	8.5	0.8	3.9575	0
2013-04-05	5.8	3	4.17311	2.6
2013-04-06	10	1.3	5.4775	0
2013-04-07	10.3	1.3	4.71	0
2013-04-08	9.8	-0.2	5.11083	0
2013-04-09	13.5	3.8	8.3675	0
2013-04-10	16.5	7.3	10.4983	0
2013-04-11	17.5	5	11.5117	0
2013-04-12	18.5	8	12.6109	2.4
2013-04-13	18.3	6.3	11.9617	0
2013-04-14	19.5	8.8	14.2175	0
2013-04-15	17.8	7	12.6492	0
2013-04-16	21.5	6	13.6125	0
2013-04-17	21.8	7.5	14.6	0
2013-04-18	24	9.3	17.0875	0
2013-04-19	23.8	11.5	17.1849	0
2013-04-20	20	10.5	14.8783	0
2013-04-21	22	10.3	16.8167	0
2013-04-22	22.5	11.5	15.4308	9.6
2013-04-23	21.5	10	15.7375	0
2013-04-24	23.8	11	17.5167	0
2013-04-25	25.3	9.8	18.0583	0
2013-04-26	26.3	12.8	20.2605	0
2013-04-27	24.3	15.3	19.0267	0
2013-04-28	24.3	13.8	19.08	0
2013-04-29	25.8	12	19.9558	0
2013-04-30	28.3	13.3	20.88	0
2013-05-01	28.3	15.8	22.04	0
2013-05-02	23.8	15.8	20.0117	0
2013-05-03	23.3	14	18.4697	3
2013-05-04	23.5	12.5	17.9667	0
2013-05-05	23.3	13.8	18.1358	2.2
2013-05-06	22.8	15.5	18.8792	0.8
2013-05-07	23.5	15.5	19.2292	0
2013-05-08	25	14	19.5158	0
2013-05-09	25.3	15.8	19.8558	0
2013-05-10	27.3	14.8	20.1983	0
2013-05-11	18	11.5	13.8492	2.4
2013-05-12	20	11	14.2533	0
2013-05-13	19	9.8	13.9483	0
2013-05-14	22.3	7.8	14.7267	2.2
2013-05-15	23.8	11.3	17.9025	0
2013-05-16	25.5	13.8	18.7675	0.2
2013-05-17	23.3	13	17.1034	20.4
2013-05-18	23	12	17.5933	0
2013-05-19	28.3	12.3	20.2475	0.2
2013-05-20	23.5	13	18.0092	0
2013-05-21	22.3	12.5	17.2458	0
2013-05-22	22.8	11.3	16.1392	0
2013-05-23	17.5	9.8	12.8542	0
2013-05-24	19.5	9	13.7496	0
2013-05-25	18.3	8.8	11.9442	2.6
2013-05-26	18.8	9	12.4808	3.8
2013-05-27	16.5	8	11.5467	1.6
2013-05-28	20.3	9.5	14.8975	0
2013-05-29	26.5	-20	15.5017	0
2013-05-30	17.5	9.5	11.3588	14.4
2013-05-31	15	9	11.48	1.8
2013-06-01	17.3	9.5	12.365	1.4
2013-06-02	20	9.3	13.2592	19
2013-06-03	18.8	9.5	13.2433	1.6
2013-06-04	17.5	9.8	12.4258	5
2013-06-05	17	12.8	14.515	0.6
2013-06-06	24.5	11.5	17.7622	0
2013-06-07	26	14.5	19.3408	0.4
2013-06-08	28.3	15.8	21.5483	0.2
2013-06-09	28.3	14	22.2658	0
2013-06-10	27.5	15.8	19.8258	0
2013-06-11	19	12.8	15.4192	8.4
2013-06-12	25.3	11.8	18.2925	0
2013-06-13	28.5	15.3	21.7783	0
2013-06-14	29	13.5	22.3471	0
2013-06-15	31.3	15	23.5075	0
2013-06-16	33.5	17.8	25.7625	0
2013-06-17	34.5	20.3	27.5842	0
2013-06-18	37	20.8	28.7117	0
2013-06-19	36.8	21	29.5533	0
2013-06-20	36.3	23.5	29.3353	0
2013-06-21	35.3	21	28.8	0
2013-06-22	33.5	17.5	26.8992	7.6
2013-06-23	32	18	24.7017	0.2
2013-06-24	23.3	11.3	15.145	27.6
2013-06-25	19.8	12.3	15.7767	0
2013-06-26	22.5	10.8	15.8924	0
2013-06-27	21.8	9.5	15.7158	0
2013-06-28	23.5	11.8	17.6583	0
2013-06-29	26	13.8	19.7025	0
2013-06-30	24.3	13.8	18.7458	0
2013-07-01	28.3	10	19.1283	0
2013-07-02	30.5	-20	21.5858	0
2013-07-03	31.8	15	23.9975	0
2013-07-04	33	16	25.2483	0
2013-07-05	31.8	19.3	24.8521	0.6
2013-07-06	30.8	17.8	23.225	10.6
2013-07-07	31.8	17	24.515	6
2013-07-08	31	19.8	24.9733	0
2013-07-09	31.5	19.8	25.195	0
2013-07-10	32.3	18.8	25.6242	0
2013-07-11	27.3	16	21.5202	0
2013-07-12	27.5	13.8	20.725	0
2013-07-13	28.3	17	21.8442	0
2013-07-14	28.5	16	22.8542	0
2013-07-15	29.3	17	22.7217	0
2013-07-16	30	12.5	20.8608	0
2013-07-17	31.5	14.5	23.4575	0
2013-07-18	33.3	17	24.784	0
2013-07-19	34.5	17.5	25.6767	0
2013-07-20	32.3	19	25.5358	0
2013-07-21	32.5	17.8	23.77	0
2013-07-22	31.8	16.3	24.0692	0
2013-07-23	33.5	15.8	25.5992	0
2013-07-24	33.5	18	25.2933	0.2
2013-07-25	31.5	20	25.195	0
2013-07-26	35	18.3	27.1092	0
2013-07-27	36.8	21.3	29.2558	0
2013-07-28	37.5	22.8	30.1608	0
2013-07-29	38.3	-20	29.03	0.2
2013-07-30	29.8	18	24.0217	0.4
2013-07-31	32.3	15	24.635	0
2013-08-01	34.5	20.5	26.3092	0
2013-08-02	37	18	27.0858	0
2013-08-03	37.8	19.5	28.7849	0
2013-08-04	36.8	20.3	29.2317	0
2013-08-05	37	19	27.76	0.2
2013-08-06	39.5	21.3	29.8667	0
2013-08-07	39	23.5	30.5925	0
2013-08-08	40.5	24.8	31.9392	0
2013-08-09	38.3	20.5	29.2479	0
2013-08-10	24	-20	17.865	15.4
2013-08-11	30.3	15	23.0967	0
2013-08-12	33.3	18.3	25.2442	0
2013-08-13	33.3	16.5	23.2558	2.2
2013-08-14	20	14.5	17.4008	1.4
2013-08-15	27.5	13.3	21.0708	0
2013-08-16	30.5	12.8	21.5983	0
2013-08-17	32.5	15.8	23.59	0
2013-08-18	33.3	15.5	24.6533	0
2013-08-19	35	18	26.33	0
2013-08-20	25	-20	18.1167	0
2013-08-21	25.5	15.8	19.805	0
2013-08-22	27.8	16	21.6108	0
2013-08-23	30.3	16.8	22.4542	0
2013-08-24	21	14.8	17.1782	7
2013-08-25	22	13.8	17.7842	0.4
2013-08-26	24	14.5	18.2242	4.8
2013-08-27	25.8	15	19.8233	8.4
2013-08-28	24.5	14.3	18.4725	23.6
2013-08-29	25.3	14.8	19.3883	0
2013-08-30	26.3	14.3	19.9633	0
2013-08-31	27.5	13.3	20.5033	0
2013-09-01	26	12.8	18.5725	0
2013-09-02	22.5	11.3	16.9775	0
2013-09-03	25.3	13.5	19.095	0
2013-09-04	26	14.5	19.6508	0
2013-09-05	29	13.8	20.2723	0
2013-09-06	29.3	14.8	20.6317	0
2013-09-07	29.8	14.3	20.5733	0
2013-09-08	29.8	12	20.7367	0
2013-09-09	19.5	12.5	15.85	9.2
2013-09-10	26.8	13.3	19.5658	0.4
2013-09-11	21.5	10.8	15.055	7
2013-09-12	21.8	11.5	15.0437	0.8
2013-09-13	20.3	9.5	13.69	0.2
2013-09-14	18	9.5	13.9508	2.2
2013-09-15	25.8	10.3	17.0617	0
2013-09-16	26	11.8	18.6833	1.4
2013-09-17	15.5	6.3	10.6675	11
2013-09-18	19	6.5	12.015	0
2013-09-19	20.3	8.3	14.0849	0.2
2013-09-20	22.8	8.5	15.025	0
2013-09-21	23.5	11.3	15.7158	0
2013-09-22	23.5	11.5	15.0333	0
2013-09-23	22.8	9.5	15.9858	0
2013-09-24	24.3	10.8	17.0858	0
2013-09-25	24.8	9	16.2462	0
2013-09-26	26.3	12.3	17.005	0
2013-09-27	13.8	9.5	10.775	1.2
2013-09-28	19.5	7.8	12.4992	0
2013-09-29	11.8	8.3	9.56167	17
2013-09-30	12	7	9.11833	9
2013-10-01	18.8	8.5	12.1225	0
2013-10-02	12	6.3	8.24333	0
2013-10-03	15.5	1.8	7.64083	0
2013-10-04	15.8	1.8	7.0725	0
2013-10-05	16.8	1.3	9.16471	0
2013-10-06	13	8.8	10.5775	0
2013-10-07	21.8	7.5	14.1467	0
2013-10-08	22.5	7.3	14.4725	0
2013-10-09	18	10.5	12.5525	0.4
2013-10-10	19	11	13.4706	0
2013-10-11	19.5	8.8	12.7933	6.6
2013-10-12	22.8	7.8	14.3008	5.6
2013-10-13	23	9.3	13.8233	0
2013-10-14	19.8	9.5	13.0067	0.2
2013-10-15	19	9.5	12.3908	0
2013-10-16	12	8.3	10.1283	2.6
2013-10-17	20.3	7.5	11.5417	0
2013-10-18	21	6.8	12.0025	0.2
2013-10-19	20.8	6	12.3967	0
2013-10-20	23.5	8.8	15.645	0
2013-10-21	25.5	12.5	16.73	0
2013-10-22	26.3	10.3	16.8208	0
2013-10-23	24	12.8	17.6608	0
2013-10-24	26.3	10.8	16.3742	0
2013-10-25	27.3	10.3	17.0739	0
2013-10-26	25.3	10	15.5008	0
2013-10-27	24.3	8.8	16.0542	0
2013-10-28	25	12.3	17.4283	0
2013-10-29	24	12.3	15.8658	0
2013-10-30	15	7	11.595	0
2013-10-31	20.8	6.3	12.0328	0
2013-11-01	20.3	7	12.1967	0
2013-11-02	18.5	6.8	11.98	1
2013-11-03	18.8	7.5	12.4608	16.6
2013-11-04	12.5	7.5	9.97833	0
2013-11-05	12.5	4	8.87667	25.6
2013-11-06	13.5	3.3	8.01917	2
2013-11-07	19	5.5	11.1639	0
2013-11-08	20.5	5.5	11.7792	0
2013-11-09	16.3	7.5	11.1658	8.4
2013-11-10	10	5.5	8.12833	5.6
2013-11-11	8	5	6.24583	24.6
2013-11-12	11	4.8	7.85417	0
2013-11-13	9	5.5	6.90083	0.6
2013-11-14	7.3	3.8	5.65167	0
2013-11-15	9	5.3	7.43613	0.2
2013-11-16	9.8	2.8	5.145	0
2013-11-17	7.3	0.8	3.59167	0.2
2013-11-18	7.3	3.3	5.57333	0
2013-11-19	8.3	4.3	6.15417	0.4
2013-11-20	8	3.5	6.61333	6.4
2013-11-21	6.3	2.8	4.98333	4.6
2013-11-22	8	5.3	6.32101	2.2
2013-11-23	9	7.5	8.11917	16.2
2013-11-24	9	3.8	6.82917	13.8
2013-11-25	4.3	-0.5	1.44667	0.4
2013-11-26	3.5	-1.2	0.378333	0
2013-11-27	3.8	-1.7	0.035	0
2013-11-28	4.8	-4	0.84958	0
2013-11-29	9	-1.2	3.19	0
2013-11-30	7	-1	2.10083	0
2013-12-01	8.5	-0.2	3.98583	0
2013-12-02	9.5	0.3	4.22833	0
2013-12-03	6.8	-2.5	1.42583	0
2013-12-04	4.8	-4.7	-1.20083	0
2013-12-05	5	-3.7	0.2925	0
2013-12-06	9	-1	2.7	0
2013-12-07	4.3	-2	1.08833	0
2013-12-08	8	-0.5	1.75083	0
2013-12-09	8	-2.2	3.16917	0
2013-12-10	11.8	-1.2	5.31833	0
2013-12-11	3	-3	-0.0025	0
2013-12-12	3.5	-3.7	-0.105833	0
2013-12-13	0.3	-3.5	-1.04118	0
2013-12-14	-0.5	-1.7	-1.18833	0
2013-12-15	1.3	-2.5	-1.2725	0
2013-12-16	-1.2	-3.2	-1.99667	0
2013-12-17	-2	-3.7	-2.845	0
2013-12-18	-2.2	-3.5	-2.81583	0
2013-12-19	2.3	-4.5	-2.175	0
2013-12-20	0.8	-3.5	-1.91167	0
2013-12-21	6.5	-3	1.48908	0
2013-12-22	3.5	-0.5	1.15583	0
2013-12-23	1.5	-0.2	0.371667	0
2013-12-24	10	0	4.0875	0
2013-12-25	11.8	5	7.57583	0
2013-12-26	9.8	6.8	7.88667	0
2013-12-27	9.5	3.8	6.5125	0
2013-12-28	11.3	3	5.8675	0
2013-12-29	9.3	1.8	5.7575	0
2013-12-30	7.5	3.5	6.11333	0
2013-12-31	6.5	2	3.47417	0

## Sheet: 2014
Date	Temperature			Rainfall
	Max.	Min.	Mean
2014-01-01	3.5	2.5	2.86833	0
2014-01-02	8.3	0	3.7425	0
2014-01-03	10.3	1	4.37143	0
2014-01-04	8	0.8	3.8225	0
2014-01-05	12	6.5	8.85667	0
2014-01-06	10.8	3.3	6.48583	0
2014-01-07	5	1.5	3.55667	0
2014-01-08	4.5	2.5	3.33167	0
2014-01-09	3.3	1	2.2525	0
2014-01-10	9.3	2	4.28571	0
2014-01-11	6.3	2.5	4.54	0
2014-01-12	12	1.5	5.42583	0
2014-01-13	11.5	-1.7	4	0
2014-01-14	6.3	3.8	4.92333	0
2014-01-15	10	0.3	4.6825	0
2014-01-16	8.8	-1	3.54333	0
2014-01-17	10.8	5.5	8.13782	0
2014-01-18	14.8	7.3	9.91583	0
2014-01-19	10.5	6.3	8.54	0
2014-01-20	13.3	6.8	9.14	0
2014-01-21	8.3	3.8	5.97833	0
2014-01-22	5	1.8	3.04083	0
2014-01-23	3	1	1.87667	0
2014-01-24	0.8	-2.7	-1.18739	0
2014-01-25	-1	-11.2	-5.045	0
2014-01-26	-1.7	-12	-7.36417	0
2014-01-27	-4.2	-9.7	-6.42917	0
2014-01-28	-1	-5.2	-3.23417	0
2014-01-29	-0.2	-4.2	-2.76583	0
2014-01-30	-0.5	-4.7	-2.77583	0
2014-01-31	-2.2	-5.5	-3.73193	0
2014-02-01	-2	-6.2	-4.165	0
2014-02-02	-0.5	-2.5	-1.67083	0
2014-02-03	4	-3	-0.715	0
2014-02-04	-1.5	-4.7	-2.73667	0
2014-02-05	-0.7	-4.2	-2.53	0
2014-02-06	4	-2.2	0.453333	0
2014-02-07	8.3	-1.7	3.8479	0
2014-02-08	9.8	4.3	5.93917	0
2014-02-09	11	1	5.69	0
2014-02-10	11.5	-1.2	4.4125	0
2014-02-11	7.3	3.8	5.8025	0
2014-02-12	5.5	-0.5	3.27417	0
2014-02-13	9.8	-1.5	3.39667	0
2014-02-14	10.8	2.3	5.41681	0
2014-02-15	10.5	1.3	6.4125	0
2014-02-16	12.5	5.5	9.005	0
2014-02-17	5.8	3.5	4.49	0
2014-02-18	7	3.3	5.03083	0
2014-02-19	10	4.3	6.27167	0
2014-02-20	12	5	7.17333	0
2014-02-21	6.3	4.5	5.42521	0
2014-02-22	7.5	3	5.92917	0
2014-02-23	8.8	1.8	5.21333	0
2014-02-24	12.3	2.5	6.59917	0
2014-02-25	8.3	1.8	4.5775	0
2014-02-26	13.3	1.8	6.7225	0
2014-02-27	13.8	4.8	8.45417	0
2014-02-28	11.8	3.8	6.57143	0
2014-03-01	14.5	1.8	7.455	0
2014-03-02	10.3	3.8	6.3875	0
2014-03-03	7.3	4.3	5.40917	0
2014-03-04	11.5	3.5	7.09167	0
2014-03-05	9.8	5.3	7.55833	0
2014-03-06	9.8	4.8	6.805	0
2014-03-07	10.8	2.8	6.53445	0
2014-03-08	13.3	4	7.795	0
2014-03-09	12.5	1.8	8.57333	0
2014-03-10	10.5	3	7.22667	0
2014-03-11	16	0.8	9.0925	0
2014-03-12	16.3	4.8	10.4742	0
2014-03-13	15	5	9.67333	0
2014-03-14	17.3	2.3	9.88992	0
2014-03-15	17	3.8	9.46917	0
2014-03-16	17	7	11.8708	0
2014-03-17	20	9	14.4758	0
2014-03-18	19.3	5.8	13.5658	0
2014-03-19	18.3	9	12.8458	0
2014-03-20	19.5	6.3	13.0403	0
2014-03-21	20.5	7.8	14.085	0
2014-03-22	18.5	9.3	13.9708	0
2014-03-23	18	5.8	12.2692	5
2014-03-24	10	3.5	6.27	3.6
2014-03-25	11.3	1.3	6.39417	0
2014-03-26	13.8	2.3	8.38167	0
2014-03-27	15	6.8	10.3542	0
2014-03-28	18.5	9	13.6563	0
2014-03-29	19	7.5	13.4117	0
2014-03-30	21	7	13.4342	0
2014-03-31	20.5	6.8	13.6192	0
2014-04-01	19.5	10.5	14.7333	0
2014-04-02	17.5	8	12.9417	0
2014-04-03	20.3	7.8	13.8825	0
2014-04-04	19.5	9.8	14.5513	0
2014-04-05	17.3	12.3	14.3167	0.4
2014-04-06	19	11	13.6625	7
2014-04-07	21.5	12	15.5342	0
2014-04-08	22.8	9.8	16.2608	0
2014-04-09	15.3	6.5	11.2217	0.2
2014-04-10	13.5	5.3	7.72	0.8
2014-04-11	15.8	3	9.05798	0
2014-04-12	15.8	5.5	10.61	0
2014-04-13	17.5	5	11.3592	0
2014-04-14	19.5	6.5	11.0367	2.2
2014-04-15	12.3	5	7.18667	0
2014-04-16	12.5	4	7.37917	0
2014-04-17	11.5	3.3	7.71583	0
2014-04-18	20.3	8.3	14.2773	0
2014-04-19	18.5	8.5	12.1592	1.6
2014-04-20	15.5	8.5	11.2575	0.4
2014-04-21	19.8	9.8	14.1075	0
2014-04-22	20.3	11.5	15.37	0
2014-04-23	20	10	15.5892	1.6
2014-04-24	20.3	13.3	16.5408	1
2014-04-25	17	12.3	14.1025	8.4
2014-04-26	20.5	11.8	15.1808	0.8
2014-04-27	21.5	10.3	15.93	0
2014-04-28	22.8	12	16.2567	0
2014-04-29	22	12.8	16.685	0
2014-04-30	22.8	12.3	16.6076	0
2014-05-01	21.5	10.8	15.8367	0.2
2014-05-02	24.5	10.5	16.0792	0.2
2014-05-03	15	5.5	10.8642	4.4
2014-05-04	15.8	4.8	9.185	5.6
2014-05-05	17.5	4.3	10.8808	0
2014-05-06	19.3	5.3	13.4242	0
2014-05-07	22	10	15.1833	5.8
2014-05-08	21.5	10.8	15.495	0.4
2014-05-09	23.3	9.3	17.1529	0
2014-05-10	23	13.5	18.4658	0
2014-05-11	23	7.3	15.0833	6.8
2014-05-12	17.3	7.3	11.9758	1.2
2014-05-13	12	8.8	9.91333	5.6
2014-05-14	14.8	8	11.3825	0
2014-05-15	10.3	8.5	9.03167	5.2
2014-05-16	10.3	8	9.22521	10.2
2014-05-17	16.3	8.5	11.6433	0.4
2014-05-18	18.8	9.5	12.6525	9.8
2014-05-19	22.5	8.8	16.7417	0
2014-05-20	25.3	11.8	19.3992	0
2014-05-21	26.8	13.5	21.0967	0
2014-05-22	28	17	22.9782	0
2014-05-23	29.3	17.5	23.5842	0
2014-05-24	27.5	16	21.4783	1.8
2014-05-25	27.3	16	21.1442	0
2014-05-26	27.5	14.8	19.5467	3.4
2014-05-27	25.8	14	19.4092	0
2014-05-28	21.8	12.5	16.2392	0.2
2014-05-29	21.8	11.3	16.1525	0
2014-05-30	18.3	8.8	12.9639	0
2014-05-31	20	8.5	14.3875	0
2014-06-01	22.8	12.8	15.5517	0.2
2014-06-02	23	13	17.4508	0
2014-06-03	23	12	17.1658	0
2014-06-04	25	11	18.535	0
2014-06-05	26.3	14.5	20.2733	0
2014-06-06	28.8	16.5	21.6842	0
2014-06-07	31.3	13.8	22.816	0
2014-06-08	32.5	16.8	24.8225	0
2014-06-09	33.8	17.5	25.8233	0
2014-06-10	35.3	18.5	27.2025	0
2014-06-11	36	21	28.9225	0
2014-06-12	32	21.8	26.3858	0
2014-06-13	29.3	20	23.8647	0
2014-06-14	26.3	16.3	20.4458	0
2014-06-15	25.5	13.3	19.28	0
2014-06-16	25.3	13.5	19.1592	0
2014-06-17	20	13.8	16.8808	1
2014-06-18	28	13.5	20.7	0
2014-06-19	29.5	13.5	23.0067	0
2014-06-20	24.5	12.8	18.6824	0
2014-06-21	23.8	11.8	18.3825	0
2014-06-22	29.5	13.3	22.125	0
2014-06-23	30.8	14.8	23.4875	21.2
2014-06-24	21.5	14.5	17.715	4.4
2014-06-25	19.3	13.3	15.6367	7
2014-06-26	24.3	10.3	17.9126	0
2014-06-27	27.3	12	19.7808	0
2014-06-28	29	14	22.5933	0
2014-06-29	30	16.5	24.0242	0
2014-06-30	21.3	12.3	15.8725	12.8
2014-07-01	26	10	19.2025	0
2014-07-02	28.8	13.5	21.6917	3
2014-07-03	28.3	13.5	20.0442	0.6
2014-07-04	28.5	13.8	22.2563	0
2014-07-05	31.3	17	23.9275	0
2014-07-06	33.5	20	25.5492	0
2014-07-07	34.8	18	27.0658	0
2014-07-08	30.5	20	25.38	0
2014-07-09	24.3	14.8	19.5175	2.8
2014-07-10	19.8	13.8	16.2442	13.6
2014-07-11	20.8	12.8	15.6983	15.6
2014-07-12	28.8	14.8	20.6992	0.2
2014-07-13	28.8	14.8	20.2425	5
2014-07-14	29.8	15.5	21.8642	0
2014-07-15	31.8	19.3	25.04	0
2014-07-16	32.5	19.8	25.3008	0
2014-07-17	31.5	19.8	24.5108	0.2
2014-07-18	30.5	20	25.0235	0.2
2014-07-19	34.5	19.8	26.2258	0
2014-07-20	32.3	19	26.3317	0
2014-07-21	32.5	19	23.9817	0
2014-07-22	23	17.5	19.6533	5.4
2014-07-23	29	17.3	21.6275	2.6
2014-07-24	28.8	15.3	21.737	0
2014-07-25	29.8	17.8	22.9633	0.2
2014-07-26	31	19	25.1792	0
2014-07-27	28.5	17.8	22.1417	0.2
2014-07-28	27	18.3	21.7658	3.6
2014-07-29	29.5	18	23.1092	0
2014-07-30	31.5	17.3	22.7808	19.8
2014-07-31	28.3	17.3	22.6225	0
2014-08-01	29.8	18.5	22.9739	0.2
2014-08-02	32	17.3	24.8233	0
2014-08-03	31.5	19	24.5167	0
2014-08-04	30	16.3	23.3233	0
2014-08-05	29.8	20	23.1525	0
2014-08-06	23	15.8	19.72	30.8
2014-08-07	27.3	17.5	22.1874	0
2014-08-08	31	17.5	24.0342	0
2014-08-09	31.5	17	24.13	6.4
2014-08-10	31.5	18.8	24.7483	0
2014-08-11	31	17.8	24.1208	0.2
2014-08-12	28.5	16.3	21.2008	0
2014-08-13	31.3	16.8	24.2525	5
2014-08-14	21.3	12.5	14.7475	45.2
2014-08-15	26.5	12.3	18.8706	0
2014-08-16	24.5	12.3	17.9842	0
2014-08-17	25	12.3	18.15	0
2014-08-18	26.5	11.5	19.6083	0
2014-08-19	27.8	13.3	20.5891	0.4
2014-08-20	21.8	16	17.7892	32.2
2014-08-21	23.3	11.5	16.2358	43
2014-08-22	25.5	13	18.5317	0
2014-08-23	24.5	13.3	18.5775	18.6
2014-08-24	24.3	10.8	16.7842	0.2
2014-08-25	24	12.3	16.8867	0
2014-08-26	24	11.8	18.04	0
2014-08-27	24	11	16.4042	5.2
2014-08-28	24.5	10	17.3567	0
2014-08-29	26.8	10.3	18.2765	0
2014-08-30	29.3	12.8	20.4333	0
2014-08-31	29	14.5	20.9658	0.2
2014-09-01	16.3	12.3	14.0367	9.8
2014-09-02	15.8	12.3	14.0367	21.6
2014-09-03	22.5	14.8	17.705	6.8
2014-09-04	25.3	17	21.0689	0.6
2014-09-05	26	16.3	20.2717	0.4
2014-09-06	23.8	15.8	18.5	1
2014-09-07	26	15	18.6067	0.4
2014-09-08	27.3	14	19.7433	0
2014-09-09	28.8	13.5	21.0425	0
2014-09-10	18.3	13.5	15.8058	18.4
2014-09-11	15.3	12.3	14.0308	23.2
2014-09-12	17	12.5	14.5681	9.4
2014-09-13	23.8	13.3	17.3292	1.4
2014-09-14	19.8	13.8	15.2625	7.8
2014-09-15	24	13.5	16.8825	1.2
2014-09-16	24.5	14	17.6425	0
2014-09-17	26.5	12.3	18.0608	0
2014-09-18	24.5	11.3	17.6042	0
2014-09-19	26.5	12	19.0798	0
2014-09-20	25	13.5	18.8242	0
2014-09-21	28.3	13.8	19.6842	16.6
2014-09-22	19.5	10	13.7517	7.2
2014-09-23	18.5	6.5	11.3575	0
2014-09-24	20.5	6	13.0667	0
2014-09-25	19	8.3	12.2941	0
2014-09-26	15.3	10	12.725	0.2
2014-09-27	19	12.3	14.6917	0.4
2014-09-28	23.8	10.3	16.01	0
2014-09-29	26	9.5	16.0783	0
2014-09-30	20.8	9.8	14.8058	0
2014-10-01	22.5	10.8	16.1758	0.6
2014-10-02	17	12.5	14.8433	3.4
2014-10-03	20.8	12	13.9067	25.6
2014-10-04	17.8	10.3	13.8125	0
2014-10-05	20	11.3	14.2008	0
2014-10-06	21	10	14.4217	0
2014-10-07	21	9.3	13.8058	0
2014-10-08	22.5	11.3	16.2375	0
2014-10-09	25.5	12.5	18.3597	0
2014-10-10	28	12.5	19.0083	0
2014-10-11	26	13.5	18.9508	0
2014-10-12	23.8	12.3	17.2942	0
2014-10-13	27	13.5	19.4842	0
2014-10-14	25.8	15	19.155	0
2014-10-15	18.8	12.3	14.8742	1.4
2014-10-16	23.3	13	16.7792	0.2
2014-10-17	20.5	10.5	14.6218	1
2014-10-18	23.8	11.3	15.6358	0
2014-10-19	23.5	9.3	15.5867	0
2014-10-20	24	10.3	16.03	0
2014-10-21	20.8	12	14.6358	11.4
2014-10-22	11.8	6	7.89412	20.2
2014-10-23	9	6.5	7.4825	16.8
2014-10-24	6.8	5.5	6.13417	3.8
2014-10-25	10.8	3.5	6.01083	0
2014-10-26	10.3	2.5	5.73667	0.2
2014-10-27	13.3	3	6.36667	0
2014-10-28	10.5	2.3	5.13333	0
2014-10-29	12.5	1.8	6.0575	0
2014-10-30	13	2.8	6.975	0
2014-10-31	14.5	2.5	7.51513	0
2014-11-01	13.8	4	7.26417	0
2014-11-02	12.5	4.8	7.13	0
2014-11-03	10.8	4.3	7.64167	0
2014-11-04	18.8	6.8	12.4225	0
2014-11-05	23	9.8	15.2958	0
2014-11-06	16	10.8	13.4733	2.4
2014-11-07	17.8	10.8	14.5798	2.8
2014-11-08	16.8	9.3	12.1292	0.4
2014-11-09	15.8	9.3	11.1117	0
2014-11-10	13.8	8.3	10.0658	0
2014-11-11	11.3	7.8	9.09417	0
2014-11-12	10.8	8.3	9.5925	0
2014-11-13	12.8	8.5	10.5815	0.4
2014-11-14	16.5	9.8	12.2058	0
2014-11-15	12.3	7.8	9.57083	0
2014-11-16	8.8	6.5	7.80083	1.4
2014-11-17	8	7	7.6225	4.6
2014-11-18	13	6.5	9.445	8.4
2014-11-19	13.3	5.8	8.26167	9.2
2014-11-20	12	1.8	6.59244	0.2
2014-11-21	9	1.8	4.98	0
2014-11-22	11.5	2.5	5.835	0
2014-11-23	10.3	2	5.075	0
2014-11-24	9	-0.2	4.0725	0
2014-11-25	5	2.8	3.915	0.4
2014-11-26	7.5	0.8	3.19583	0
2014-11-27	2.5	0.5	1.375	0
2014-11-28	2.3	0.8	1.38992	0
2014-11-29	2.5	0.8	1.76833	0.2
2014-11-30	1.8	0.8	1.33333	7.2
2014-12-01	1.5	-0.2	1.09917	8.6
2014-12-02	2.5	-0.5	0.885833	0.4
2014-12-03	4.3	2	3.58917	0.6
2014-12-04	7	2.3	4.47	0.6
2014-12-05	4.8	3.3	4.22689	0.4
2014-12-06	5.5	4	4.7175	14
2014-12-07	5.5	4	4.715	6.2
2014-12-08	6	3	4.3975	1
2014-12-09	3	0.3	1.86083	1
2014-12-10	4.5	-2.2	0.6725	0
2014-12-11	5.8	-2	0.9975	0
2014-12-12	7.5	-2	2.2	0
2014-12-13	12.3	1	5.87333	0
2014-12-14	6.5	1.8	4.22917	0
2014-12-15	6.5	0.5	3.2425	0
2014-12-16	4.8	1.3	3.37899	0
2014-12-17	12	1	5.18833	0
2014-12-18	7.5	1	3.78	0
2014-12-19	14.5	3.5	7.8825	0
2014-12-20	12.8	5	8.19667	0
2014-12-21	8.5	-0.2	4.7825	0
2014-12-22	8.5	-1.7	4.56417	0
2014-12-23	13.3	2.3	6.97479	0
2014-12-24	11	-1	3.52083	0
2014-12-25	8	-2.5	3.175	0
2014-12-26	5.5	-3.7	1.57167	0
2014-12-27	2	-4	-0.956667	0
2014-12-28	-1.7	-7.7	-3.4525	0
2014-12-29	0.8	-8	-4.97899	0
2014-12-30	-1.2	-8.7	-6.13083	0
2014-12-31	-3.5	-10.5	-7.705	0

## Sheet: 2015
Date	Temperature			Rainfall
	Max.	Min.	Mean
2015-01-01	-3.5	-8.2	-5.65833	0
2015-01-02	3.3	-5.2	-1.4775	0
2015-01-03	5.3	-1.2	3.14083	0
2015-01-04	8	-0.7	3.05333	0
2015-01-05	1.8	-3.2	-0.771667	0
2015-01-06	4	-4.5	0.208333	0
2015-01-07	-3	-5.7	-4.24833	0
2015-01-08	-2.2	-6.2	-3.32917	0
2015-01-09	5.8	-3.7	0.898319	0
2015-01-10	13.3	3.5	7.2125	0
2015-01-11	8.3	-1.5	4.08	0
2015-01-12	8.3	-2	2.5975	0
2015-01-13	12	-1.7	3.90083	0
2015-01-14	8.5	1.8	5.02833	0
2015-01-15	10	-0.5	5.03167	0
2015-01-16	12.8	4.5	8.18655	0
2015-01-17	11	5	8.45917	0
2015-01-18	5.5	2.3	3.94833	0
2015-01-19	4	0	1.97167	0
2015-01-20	5	0.8	2.98417	0
2015-01-21	5.3	2	3.82333	0
2015-01-22	5.5	3.3	4.38917	0
2015-01-23	6	1.3	4.66891	0
2015-01-24	1	-1.2	-0.435	0
2015-01-25	0.8	-0.7	0.065	0
2015-01-26	5.5	-4	0.569167	0
2015-01-27	1.3	-5.2	-2.08583	0
2015-01-28	6.5	-3	1.36167	0
2015-01-29	1.3	-3	-1.145	0
2015-01-30	4.3	-0.5	1.20336	0
2015-01-31	6.8	-1.7	1.68083	0
2015-02-01	3	-1.5	0.0791667	0
2015-02-02	4.8	-1.7	1.01583	0
2015-02-03	5.3	-3.7	-0.309167	0
2015-02-04	2	-1.2	0.276667	0
2015-02-05	4.5	-2.2	0.536667	0
2015-02-06	1.5	-2.2	-0.653782	0
2015-02-07	-0.2	-5.5	-3.4325	0
2015-02-08	4	-6.2	-1.9225	0
2015-02-09	2.3	-4.7	-2.20083	0
2015-02-10	3.8	1.5	2.75917	0
2015-02-11	4.5	2	2.83583	0
2015-02-12	6	-1.5	1.80667	0
2015-02-13	8.3	-2.7	1.26555	0
2015-02-14	7.3	-2.2	2.2925	0
2015-02-15	8.3	0.3	3.62	0
2015-02-16	10.5	-0.2	4.28908	0
2015-02-17	4	-2.2	-0.0525	0
2015-02-18	6	-4.5	0.834167	0
2015-02-19	6.5	-1.5	1.89917	0
2015-02-20	10.8	-4	2.70917	0
2015-02-21	11	1	5.44833	0
2015-02-22	6.3	3	4.51917	0
2015-02-23	5.8	3.3	4.33917	0
2015-02-24	6	3.8	4.8775	0
2015-02-25	5.8	3.3	4.35417	0
2015-02-26	6	1.3	4.2775	0
2015-02-27	6.8	-2	2.99664	0
2015-02-28	10	2.5	5.78417	0
2015-03-01	8.8	1.8	5.185	0
2015-03-02	10.3	2.8	6.61	0
2015-03-03	11.8	2.5	6.115	0
2015-03-04	12	1.3	5.3125	0
2015-03-05	8.8	2.3	5.04667	0
2015-03-06	9.5	-0.2	4.18739	0
2015-03-07	9.5	-1.7	4.15083	0
2015-03-08	10.8	-2.2	4.21	0
2015-03-09	11.3	-1.5	4.86917	0
2015-03-10	13	-0.2	6.76833	0
2015-03-11	12	2	6.00667	0
2015-03-12	5	1.3	2.755	0
2015-03-13	5.3	2.3	3.78571	0
2015-03-14	7.8	2.5	4.27083	0
2015-03-15	8.3	3	5.72667	0
2015-03-16	14.3	4	8.4075	0
2015-03-17	14.8	3.5	8.23917	0
2015-03-18	12	3.3	7.1875	0
2015-03-19	11	0.8	5.68151	0
2015-03-20	11.8	1.5	6.28583	0
2015-03-21	16	1.5	8.82833	0
2015-03-22	14.3	3.8	8.12167	0
2015-03-23	11.8	1.5	6.73167	0
2015-03-24	15	3.5	8.9175	0
2015-03-25	14	6.5	9.70833	0.6
2015-03-26	17.3	7.5	11.9175	3.8
2015-03-27	11.3	7.8	9.3042	0
2015-03-28	12.5	4.8	8.5725	0
2015-03-29	14.5	2.3	8.66667	0
2015-03-30	16.5	5.3	10.0175	0.8
2015-03-31	17.3	2.3	9.65333	2
2015-04-01	11.5	0.8	6.94083	0
2015-04-02	12.3	0.5	5.71167	0
2015-04-03	11	1.3	5.9395	0
2015-04-04	10.5	1	6.08333	0
2015-04-05	10.5	2.3	6.18583	0
2015-04-06	10.3	0.3	4.68167	0
2015-04-07	10.3	0.8	5.51333	0
2015-04-08	10.8	5.3	7.65417	0
2015-04-09	14	5.5	8.9825	0
2015-04-10	19.8	3.3	12.1261	0
2015-04-11	20.5	7.5	14.8967	0
2015-04-12	22	9.3	16.3058	0
2015-04-13	23	6.5	14.485	0
2015-04-14	17	7.3	11.4592	0
2015-04-15	23.3	6.3	15.7017	0
2015-04-16	26.3	9.3	17.465	0
2015-04-17	18.8	10	14.2319	3.8
2015-04-18	11.3	3.5	8.2675	0
2015-04-19	13.5	3.8	8.45333	0
2015-04-20	18	5.8	12.2142	0
2015-04-21	19.5	7.5	13.7	0
2015-04-22	21.5	11.5	15.6462	0
2015-04-23	22.5	9.5	16.1233	0
2015-04-24	20.8	9.8	15.0375	0
2015-04-25	21.5	8	15.3033	0
2015-04-26	23.3	12.3	17.5467	0
2015-04-27	23.3	11.3	17.2358	0
2015-04-28	20	7	12.9125	0
2015-04-29	16.8	7	11.6496	0
2015-04-30	18.8	7.3	13.3158	0
2015-05-01	19.5	8	14.0325	0
2015-05-02	19	11.3	14.5333	10
2015-05-03	17.5	10.3	13.4575	0.8
2015-05-04	25.8	12.5	18.8875	0
2015-05-05	27.3	14	20.725	0
2015-05-06	26.8	13.5	19.6167	1.6
2015-05-07	23.8	12	18.0092	0
2015-05-08	25.3	12	19.0867	0
2015-05-09	26	13.5	18.885	0
2015-05-10	23.5	14.3	18.1925	0
2015-05-11	21.5	10.3	15.4833	0
2015-05-12	23.8	9.5	17.4308	0
2015-05-13	28	12.5	19.5317	5.4
2015-05-14	24	13.5	18.1683	1
2015-05-15	15.5	10.8	13.721	1.6
2015-05-16	21.3	12.3	15.9133	0
2015-05-17	23.8	12.3	18.22	0
2015-05-18	24.8	12.8	19.0867	0
2015-05-19	29.5	15	21.4442	0.2
2015-05-20	28.5	10.3	18.4325	1.4
2015-05-21	11.5	9.8	10.655	13.6
2015-05-22	13.3	10	11.3933	15.8
2015-05-23	15.3	10.8	12.1975	14.8
2015-05-24	20.3	10.8	14.5592	0
2015-05-25	16.3	11.3	13.5083	1.6
2015-05-26	16.3	11.3	13.9008	5.4
2015-05-27	18.3	8.5	12.69	0
2015-05-28	18.8	7.5	12.7	0
2015-05-29	23.8	7	16.2387	0
2015-05-30	25.3	12	19.2433	0
2015-05-31	24	14.3	17.8608	0.4
2015-06-01	28.3	13.8	21.115	0
2015-06-02	30	16.8	23.4525	0
2015-06-03	31	17.3	24.4725	0
2015-06-04	30.5	18.8	24.3133	0
2015-06-05	28	17.3	22.2639	0
2015-06-06	31	16.5	23.7017	0
2015-06-07	31	18.8	25.0183	0
2015-06-08	32.8	17.3	24.9025	0
2015-06-09	28.5	18.8	22.7092	0
2015-06-10	29	14	21.7825	0
2015-06-11	30.3	17.8	23.9142	0
2015-06-12	31.5	20	25.6546	0
2015-06-13	31.8	18.3	25.37	0
2015-06-14	32.3	19.5	25.8717	0
2015-06-15	28.8	17.8	22.2808	0
2015-06-16	26.3	15.3	19.3733	0
2015-06-17	23.3	14	17.2792	0
2015-06-18	26.5	13	19.41	0
2015-06-19	21	13	17.6143	0.2
2015-06-20	22.8	12	15.8375	0.2
2015-06-21	23	10.3	16.2367	0
2015-06-22	25.3	11.8	19.4075	0
2015-06-23	18	11.3	13.9675	7.8
2015-06-24	24	11.5	15.6775	0.8
2015-06-25	25.3	13.3	18.9708	0
2015-06-26	27.3	13.3	20.5034	0
2015-06-27	26.8	14.8	20.4042	0
2015-06-28	25.5	16.8	20.0267	0
2015-06-29	26.5	15.5	20.8975	0
2015-06-30	29.8	17.3	23.3275	0
2015-07-01	32.8	15	24.3292	0
2015-07-02	33.3	17	26.0151	0
2015-07-03	31.3	19.3	25.1808	0
2015-07-04	33	16.5	25.3508	0
2015-07-05	34.3	17.5	26.6883	0
2015-07-06	35	17.5	27.645	0
2015-07-07	36.5	22.5	30.3342	0
2015-07-08	36	16	25.2967	6.8
2015-07-09	24.3	15.3	18.5546	4.4
2015-07-10	25.8	13.5	20.1317	0
2015-07-11	30.5	14	22.4858	0
2015-07-12	33.8	16.8	25.6633	0
2015-07-13	24.5	16.8	19.845	7.2
2015-07-14	29.3	17.8	22.8892	0
2015-07-15	32	19.5	25.1483	0.2
2015-07-16	34	19	26.4983	0
2015-07-17	36.5	22.8	29.3235	0
2015-07-18	34	23	27.9083	0
2015-07-19	37.3	21.3	29.0467	0
2015-07-20	34.5	23	28.2525	0
2015-07-21	36.5	21.5	29.4242	0
2015-07-22	37.8	21.8	30.4067	0
2015-07-23	38.5	21	29.7267	1.2
2015-07-24	35.5	22	28.979	0
2015-07-25	34.8	19.8	26.4383	0
2015-07-26	25	15	19.2325	2.2
2015-07-27	22.3	14.3	16.9267	5.4
2015-07-28	25	16.5	20.3592	0
2015-07-29	24	16	19.2933	0
2015-07-30	21.5	14.5	16.9958	2.2
2015-07-31	28.3	15	20.4168	0
2015-08-01	29.8	12.3	21.6492	0
2015-08-02	30.3	19.5	23.9408	0
2015-08-03	32.5	19.5	25.9475	0
2015-08-04	35	19.8	27.3092	0
2015-08-05	35.5	19.5	27.9117	0
2015-08-06	37.8	20	28.4058	0
2015-08-07	37.5	20.8	29.6975	0
2015-08-08	38.3	24.3	30.1267	0
2015-08-09	37	21.5	28.8158	0
2015-08-10	37	19.3	28.225	0
2015-08-11	37.5	20	28.9875	0
2015-08-12	38.5	20.8	30.2192	0
2015-08-13	39	24.5	31.4133	0
2015-08-14	37.3	25	29.8513	0
2015-08-15	37.5	20	28.2008	7.6
2015-08-16	32.5	17.3	25.0567	26.6
2015-08-17	26	16.8	18.9125	10.2
2015-08-18	25.8	15	19.1292	1.2
2015-08-19	25.5	16.3	19.6067	0
2015-08-20	23	16	17.8408	0
2015-08-21	25	13.5	19.6267	0
2015-08-22	25.5	14.8	18.6983	0
2015-08-23	26	14.8	19.5692	0
2015-08-24	30	14.8	22.73	0
2015-08-25	22.5	17.5	19.5442	1.2
2015-08-26	28.3	16.3	21.3683	0
2015-08-27	28	14.5	21.09	0
2015-08-28	33	15.8	23.9983	0
2015-08-29	35	15.8	25.7258	0
2015-08-30	37.3	18.8	27.1942	0
2015-08-31	36.8	19.3	26.8083	0
2015-09-01	32.8	17	25.2358	0
2015-09-02	28.3	17	22.105	0
2015-09-03	27.5	13.5	20.7639	0
2015-09-04	27.5	14.5	20.2267	2.2
2015-09-05	19.3	13	15.1317	18.4
2015-09-06	23	11	14.005	2.2
2015-09-07	21.3	7.5	14.5967	0
2015-09-08	21.3	9.8	14.55	0
2015-09-09	24.8	9.5	16.825	0
2015-09-10	22.8	11.3	14.3689	1.8
2015-09-11	20.8	11	14.5542	0
2015-09-12	26.3	10.8	17.6133	0
2015-09-13	28	13.3	19.3225	0
2015-09-14	29.3	15	21.6792	0
2015-09-15	31.5	17.5	23.4908	0
2015-09-16	30.5	16.5	23.4008	0
2015-09-17	31.8	19.3	25.2899	0
2015-09-18	30	16	23.3117	0
2015-09-19	24	-20	12.6842	0
2015-09-20	24.5	12	16.8633	5.6
2015-09-21	23	9.5	15.4563	0
2015-09-22	25.5	7.5	15.9008	0
2015-09-23	17	9.8	12.055	8.2
2015-09-26	17.5	11.8	13.4342	1
2015-09-27	17.8	10.8	13.1942	0
2015-09-28	19.3	9.3	12.8733	0
2015-09-29	17.3	9.3	12.8625	0
2015-09-30	17.8	9	11.6242	0
2015-10-01	20.8	8.3	12.8675	0
2015-10-02	23.5	8	13.7798	0
2015-10-03	23.5	9.3	14.9375	0
2015-10-04	23	10.3	16.0183	1.2
2015-10-05	21.3	10.5	14.2942	1.8
2015-10-06	19.5	9.5	13.7442	0.2
2015-10-07	21.3	11.8	14.6942	0
2015-10-08	14.5	9.8	11.8417	8.4
2015-10-09	19.8	10	12.6167	0
2015-10-10	13.8	9.5	11.1717	9.2
2015-10-11	9.5	4	6.18	32.2
2015-10-12	10.3	0	4.6175	0.2
2015-10-13	9	0.5	6.51917	1.2
2015-10-14	9.8	8	8.92333	24.2
2015-10-15	12.8	9.3	11.0283	0
2015-10-16	14.3	10.8	11.8151	0
2015-10-17	16.3	4.5	8.80667	0
2015-10-18	16.5	6.3	10.0067	0
2015-10-19	9.8	6	7.77083	29.8
2015-10-20	11.8	4	6.82167	5.4
2015-10-21	12.8	3.8	8.04167	0
2015-10-22	15.5	3.8	9.10084	0
2015-10-23	19	3.3	9.24	0
2015-10-24	18.8	4	10.2208	0
2015-10-25	17	3	9.59583	0
2015-10-26	19.5	5.5	11.0825	0
2015-10-27	18.3	5.8	10.1183	0
2015-10-28	11.8	4.8	7.37917	0
2015-10-29	12.3	6.3	8.69917	0
2015-10-30	19.5	3.3	10.205	0
2015-10-31	18.5	2.5	9.40917	0
2015-11-01	17.8	3.3	8.57083	0
2015-11-02	16.3	0	5.97167	0
2015-11-03	16	-0.5	6.86083	0
2015-11-04	12.8	2	5.62833	0
2015-11-05	15.3	1.8	6.72333	0
2015-11-06	17.8	2.3	8.4325	0
2015-11-07	15.8	1	8.99748	0
2015-11-08	21	7	12.315	0
2015-11-09	19	5.5	12.3483	0
2015-11-10	19.8	9.5	14.0958	0
2015-11-11	24.3	8.3	15.0508	0
2015-11-12	20.5	5.3	12.0433	0
2015-11-13	18	3.5	9.32185	0
2015-11-14	17	4.8	9.64333	0
2015-11-15	11	6.8	8.56583	0
2015-11-16	20.5	8.5	12.5992	0
2015-11-17	18.8	5	10.145	0
2015-11-18	18.5	6.5	11.1517	0
2015-11-19	17.8	4.3	9.24417	0
2015-11-20	14.3	7.3	10.8538	0
2015-11-21	13	3.3	5.4975	16
2015-11-22	6	-0.2	2.79583	0
2015-11-23	8.8	-1	3.43083	0
2015-11-24	5.5	-1	2.2275	0
2015-11-25	2.3	-1.5	0.8825	0
2015-11-26	3.5	0.3	1.34	0
2015-11-27	6.3	0.3	2.07899	0
2015-11-28	4	0.3	1.8725	0
2015-11-29	9.3	0.8	4.69167	0
2015-11-30	11	3.3	6.51833	0
2015-12-01	14.5	5.3	8.61417	1.2
2015-12-02	10.8	2.3	6.41417	1
2015-12-03	6.8	0.3	4.05042	0
2015-12-04	5.8	-20	-1.46833	0
2015-12-05	3.8	0.5	2.01917	0
2015-12-06	3.3	2	2.7425	0
2015-12-07	2.5	1	1.56	0.2
2015-12-08	3	1.3	2.2375	0
2015-12-09	4	2	2.61083	0.8
2015-12-10	7	0.8	5.21667	1.8
2015-12-11	8.5	-1	3.14874	0
2015-12-12	1	-1.5	-0.234167	0
2015-12-13	0.3	-2.7	-1.19083	0
2015-12-14	7.8	-2.7	0.615833	0
2015-12-15	1.5	-1.2	0.231667	0
2015-12-16	2.8	0.8	1.74917	0
2015-12-17	1	-0.5	0.138333	0
2015-12-18	0.5	-1	0.0159664	0.2
2015-12-19	3.8	-0.2	2.02833	0
2015-12-20	3	1.8	2.49083	0
2015-12-21	4.3	0.3	2.11667	0
2015-12-22	4	-0.2	1.40167	0
2015-12-23	11.3	1.8	5.72083	0
2015-12-24	5.3	0.5	2.41083	0
2015-12-25	2.8	-0.2	1.7975	0
2015-12-26	8.8	-1.7	1.245	0
2015-12-27	-0.2	-2.5	-1.2275	0
2015-12-28	1.8	-3	-1.24083	0
2015-12-29	1.8	-1	0.528333	0
2015-12-30	2.8	-4.7	-0.0341667	0
2015-12-31	-0.5	-7.2	-3.78583	0

## Sheet: 2017
Date	Temperature			Rainfall
	Max.	Min.	Mean
2017-01-01	5.3	-8.2	-3.305	0
2017-01-02	0.3	-8.2	-5.40083	0
2017-01-03	4.3	-3.5	0.005	0
2017-01-04	-1	-3.6	-2.90583	0
2017-01-05	2.8	-6.2	-1.69083	0
2017-01-06	-4.5	-10.7	-7.55882	0
2017-01-07	-6	-13.5	-10.6408	0
2017-01-08	-3.2	-11.2	-8.68667	0
2017-01-09	-1.5	-9.2	-5.42083	0
2017-01-10	-4	-12.5	-9.515	0
2017-01-11	-3.7	-14.7	-10.0525	0
2017-01-12	2.8	-8.7	-2.36807	0
2017-01-13	3.3	-1.5	0.988333	0
2017-01-14	3.5	-1.5	0.515	0
2017-01-15	5	-6.2	-0.634167	0
2017-01-16	0.5	-6.7	-3.09083	0
2017-01-17	1.3	-5.2	-2.63417	0
2017-01-18	-2	-5	-3.51083	0
2017-01-19	2.5	-9.5	-4.15333	0
2017-01-20	-0.5	-12.2	-7.10756	0
2017-01-21	0.8	-11.2	-6.54583	0
2017-01-22	-0.5	-10.7	-5.95333	0
2017-01-23	-5.7	-8.5	-7.48167	0
2017-01-24	-5.2	-7.7	-6.36083	0
2017-01-25	-3.2	-5.5	-4.2525	0
2017-01-26	-0.7	-7.7	-4.02333	0
2017-01-27	-5.2	-8.7	-6.63361	0
2017-01-28	-5.7	-8.2	-7.115	0
2017-01-29	-7.5	-8.7	-8.34083	0
2017-01-30	-7	-10	-8.455	0
2017-01-31	-2.2	-7.7	-5.35333	0
2017-02-01	0.3	-2.2	-0.715833	0
2017-02-02	7.3	-1	2.78333	0
2017-02-03	12.3	4	7.81933	0
2017-02-04	10.5	-0.5	5.7	0
2017-02-05	11.3	1.5	5.805	0
2017-02-06	4.8	1	3.55	0
2017-02-07	3.8	-2.5	0.1075	0
2017-02-08	-0.2	-4	-2.07667	0
2017-02-09	-0.2	-1.7	-0.959167	0
2017-02-10	4.5	-2.5	-0.262185	0
2017-02-11	1.5	-3	-0.945833	0
2017-02-12	3.5	-3.2	-0.731667	0
2017-02-13	3.8	-4.7	-1.47083	0
2017-02-14	5.8	-6.5	-1.01917	0
2017-02-15	9.5	-5.5	0.0825	0
2017-02-16	-1.7	-3.7	-3.04667	0
2017-02-17	-1.5	-4.2	-2.90924	0
2017-02-18	10	-1.7	3.32167	0
2017-02-19	5	-3	0.5525	0
2017-02-20	5.3	-2	0.493333	0
2017-02-21	8.5	-1	4.47	0
2017-02-22	12.3	2.8	7.30583	0
2017-02-23	12.8	5	8.48319	0
2017-02-24	12.5	4.3	7.64083	0
2017-02-25	10.8	0.3	5.03667	0
2017-02-26	10.5	-2.7	3.86833	0
2017-02-27	14	2.3	7.6	0
2017-02-28	13.5	6.5	10.1925	0
2017-03-01	11.3	1.5	6.1625	0
2017-03-02	13.5	0.3	6.89583	0
2017-03-03	13.5	-20	7.68487	0
2017-03-04	16.8	5.5	11.2408	0
2017-03-05	11.5	5.3	8.03	0
2017-03-06	6.5	-20	-0.595	0
2017-03-07	12.8	2.3	6.47	0
2017-03-08	13	3.5	7.65167	0
2017-03-09	15	2.5	8.04167	0
2017-03-10	10.3	4.8	6.8916	0
2017-03-11	10	2.5	5.73833	0
2017-03-12	10.8	2.5	5.68583	0
2017-03-13	13.3	3	7.4475	0
2017-03-14	13.5	4	7.97083	0
2017-03-15	12.8	4.3	8.8175	0
2017-03-16	16	6.3	10.8605	0
2017-03-17	15.8	3	10.6083	0
2017-03-18	12.3	8	9.77333	0
2017-03-19	12.8	5.8	8.81	0
2017-03-20	18.3	5.3	11.6375	0
2017-03-21	20.8	7.8	14.0725	0
2017-03-22	21.8	8	13.8058	0
2017-03-23	22	4.8	13.555	0
2017-03-24	16	6	10.558	0
2017-03-25	13	4.3	9.24083	0
2017-03-26	12	4.5	8.10083	0
2017-03-27	12.5	1.8	7.68167	0
2017-03-28	18.8	3.3	11.37	0
2017-03-29	23	5.5	14.7842	0
2017-03-30	20.8	10.3	15.725	0
2017-03-31	21	7.5	14.1697	0
2017-04-01	22.3	10.3	16.3008	0
2017-04-02	24.3	9.8	16.205	0
2017-04-03	23.3	9.5	17.2242	0
2017-04-04	19.8	9.5	13.9742	0.4
2017-04-05	14	9.8	11.1133	0.6
2017-04-06	12	6	9.29748	0
2017-04-07	9.5	6.3	7.55583	0.6
2017-04-08	17.3	7.5	11.7017	0
2017-04-09	18.3	6.8	12.9217	0
2017-04-10	23	9.5	15.3733	0
2017-04-11	15.5	6	12.1358	0
2017-04-12	16.3	3.8	10.8714	0
2017-04-13	19.8	7.5	12.3325	0
2017-04-14	18.8	6.5	13.1242	0.2
2017-04-15	17.8	9	13.01	0.6
2017-04-16	16.5	7.3	11.4283	1.2
2017-04-17	13.8	6	9.47167	0
2017-04-18	12.3	2.8	6.98083	0.4
2017-04-19	2.8	-0.2	1.32417	4.8
2017-04-20	4.5	-0.5	1.84833	2.6
2017-04-21	11.8	-0.5	6.11261	0
2017-04-22	16	3.5	9.13	0
2017-04-23	13	5	8.24583	0
2017-04-24	16.3	4.8	10.5	0
2017-04-25	20.5	8	14.4692	0
2017-04-26	20	10.3	15.0058	0
2017-04-27	15.5	8.3	11.7067	0
2017-04-28	11.3	4.8	7.75126	7.2
2017-04-29	14.8	3.3	9.37417	0
2017-04-30	15.5	4.3	11.3483	0
2017-05-01	18.3	7.8	13.06	0
2017-05-02	21	10.3	15.2425	0
2017-05-03	14.3	8	11.5292	3.2
2017-05-04	21.3	8	13.2875	0
2017-05-05	18	10.8	12.9059	10
2017-05-06	22	11.3	16	0
2017-05-07	21	10.8	14.7817	2.8
2017-05-08	21.3	10	15.7775	0
2017-05-09	15	4	10.1575	2
2017-05-10	15.8	2.3	9.62083	0
2017-05-11	22	7.5	15.8958	0
2017-05-12	26.3	13	19.3429	0
2017-05-13	22.8	12.8	17.3275	0
2017-05-14	26	13	20.91	0
2017-05-15	24.5	15	19.1417	0.2
2017-05-16	25.3	13.5	19.5408	0
2017-05-17	24.8	14.5	19.3225	0
2017-05-18	26	13.5	20.2625	0
2017-05-19	26.8	14.5	21.3151	0
2017-05-20	21.5	13.5	16.8242	0
2017-05-21	21.8	11.5	16.3508	5
2017-05-22	25.3	13.3	19.1617	0
2017-05-23	25.5	14	18.4558	0.8
2017-05-24	22.3	13.8	17.0875	0
2017-05-25	19.5	11	15.3692	0
2017-05-26	23.5	12.8	18.4378	0
2017-05-27	26.8	15.5	20.9558	0
2017-05-28	26.3	14.5	20.0642	0
2017-05-29	29	11.8	21.33	0
2017-05-30	30.5	14.8	23.2775	0
2017-05-31	31	17.3	24.8683	0
2017-06-01	29.5	18.3	23.275	2.2
2017-06-02	28	15	20.7613	4.8
2017-06-03	29.5	15.8	22.8825	0
2017-06-04	30.3	15.3	22.5267	5.4
2017-06-05	27.3	14.5	20.9833	0
2017-06-06	29.3	16.3	21.8733	1.2
2017-06-07	21	13.3	16.2933	0.2
2017-06-08	24.8	11.5	18.0642	0
2017-06-09	29.3	11.8	20.7756	0
2017-06-10	26.5	14.5	19.8575	0.2
2017-06-11	27.3	13.8	20.7475	0
2017-06-12	30.8	13.8	23.0283	0.6
2017-06-13	30	18.3	24.2067	0
2017-06-14	27	16	21.5842	0
2017-06-15	29.5	14.3	22.6633	0
2017-06-16	27	16.3	21.1227	1.8
2017-06-17	23.3	14	17.8108	0
2017-06-18	26.5	14.3	19.8858	0
2017-06-19	30	14.5	23.3025	0
2017-06-20	33	14.5	24.8417	0
2017-06-21	33.8	17.8	25.455	0
2017-06-22	35.3	18.3	27.2233	0
2017-06-23	35.3	20.5	26.1454	0
2017-06-24	34.5	20	27.2217	0
2017-06-25	29.8	16.3	21.35	21
2017-06-26	31.3	17.3	23.7425	0
2017-06-27	31	17	25.5558	0
2017-06-28	32.8	19.5	24.8575	0.6
2017-06-29	28.3	16.5	22.6017	4.4
2017-06-30	30	16.5	22.6975	2.4
2017-07-01	30.8	15.3	20.9	4.6
2017-07-02	27	16.5	21.1308	0
2017-07-03	28	16.5	21.0567	0
2017-07-04	28.8	13.8	22.3775	0
2017-07-05	32	15.8	24.5708	0
2017-07-06	33	17.8	25.9292	0
2017-07-07	34.3	18	24.6941	0.8
2017-07-08	34.8	18.3	25.5633	0.4
2017-07-09	34	18	25.8508	20.6
2017-07-10	35.5	21.5	27.9233	0
2017-07-11	31.5	16.8	25.51	7.6
2017-07-12	32.3	16.8	23.5133	14.8
2017-07-13	25.8	15	21.2967	0
2017-07-14	22.3	13.3	18.3143	0
2017-07-15	24.5	13.8	19.0733	0
2017-07-16	26.3	12.5	19.7383	0
2017-07-17	29.3	14	22.3417	0
2017-07-18	32.5	14.5	23.6583	0
2017-07-19	34.5	17.3	26.1583	0
2017-07-20	36.3	17	26.5558	0
2017-07-21	33.5	19.3	25.7311	0
2017-07-22	33	19.5	25.8167	0.6
2017-07-23	32.3	22.5	26.6767	0
2017-07-24	31.8	14.3	23.4658	8.8
2017-07-25	26	14.3	20.0417	1.2
2017-07-26	25	12.5	17.7517	7
2017-07-27	22.8	14.3	17.3425	0.8
2017-07-28	30	15.3	22.6202	0
2017-07-29	31	17.3	23.7842	0
2017-07-30	33.3	19.3	26.0025	0
2017-07-31	34.8	18.8	26.875	0
2017-08-01	35.3	20.3	28.405	0
2017-08-02	35.8	22.5	29.4908	0
2017-08-03	38	21.5	29.1283	0
2017-08-04	40	21.8	31.1319	0
2017-08-05	35.5	22.3	29.4	0
2017-08-06	29.5	16.3	23.6058	12
2017-08-07	26.8	15.8	20.3225	1.6
2017-08-08	29.3	17	22.9525	0
2017-08-09	34.3	19.5	27.2308	0
2017-08-10	37.3	23.3	29.37	0
2017-08-11	35.8	17	26.995	5.4
2017-08-12	24.8	14.8	19.1408	0.2
2017-08-13	26	15	20.7442	0
2017-08-14	29.8	16.5	23.05	0
2017-08-15	32.3	17.8	24.337	0
2017-08-16	33	16.5	25.2683	0
2017-08-17	32.8	20.5	26.3158	0
2017-08-18	35.3	17.3	26.6358	0
2017-08-19	30.3	15.3	22.975	3.8
2017-08-20	25.5	14	19.0917	4.6
2017-08-21	24.8	15.3	19.3792	0
2017-08-22	25.5	11.8	18.9083	0
2017-08-23	26.5	13	20.05	0
2017-08-24	31.8	14.5	22.8042	0
2017-08-25	32.8	17.5	25.2867	0
2017-08-26	36.3	18.3	26.8958	0
2017-08-27	35	18	25.6775	3.8
2017-08-28	29.3	19	22.6675	0
2017-08-29	29	16	21.3717	0
2017-08-30	29.5	13.5	22.1058	0
2017-08-31	33	15	24.625	0
2017-09-01	30.3	16	23.3412	0
2017-09-02	22.5	11.3	15.2692	17.6
2017-09-03	16.8	11.3	13.2958	0
2017-09-04	23.5	9.3	15.9792	0
2017-09-05	24.8	8.8	17.1658	0
2017-09-06	25.8	10.5	18.8117	0.2
2017-09-07	18.5	10.5	15.055	1.2
2017-09-08	23.5	9.8	15.842	0
2017-09-09	26	10.3	17.9125	0
2017-09-10	30.8	13.8	21.6025	0
2017-09-11	25.3	15.5	19.9742	0.2
2017-09-12	19.3	12.5	14.94	12
2017-09-13	22.3	10.8	16.5775	0
2017-09-14	26.3	9.3	18.8392	3.8
2017-09-15	16.5	8.8	11.4983	3
2017-09-16	20.3	11	14.4992	19.6
2017-09-17	15.3	9	13.0217	0
2017-09-18	22.3	8.3	14.865	0.2
2017-09-19	14	10.3	11.52	14.6
2017-09-20	12.3	9.8	10.8242	0
2017-09-21	15	10	11.9158	0.2
2017-09-22	20.8	10.5	14.784	0
2017-09-23	21.8	10.5	14.4042	0
2017-09-24	21.5	10	13.8192	0
2017-09-25	20.5	9	14.2825	0
2017-09-26	24	13	17.2492	0
2017-09-27	22.5	12	15.59	0
2017-09-28	23.5	10.5	15.4725	0
2017-09-29	22.5	9.8	14.7151	0
2017-09-30	20.8	9	13.065	0
2017-10-01	20.8	6.5	12.745	0
2017-10-02	21.3	7.8	12.8683	0
2017-10-03	18	6.5	11.4258	6.6
2017-10-04	19.8	6.3	12.7525	0.2
2017-10-05	22.8	8.8	15.4867	0
2017-10-06	16.5	5.3	11.1824	0
2017-10-07	18.5	4.8	11.1775	0
2017-10-08	15.3	5.3	9.8025	0.2
2017-10-09	17.3	8.5	11.0258	0
2017-10-10	19.3	6.5	12.2808	0
2017-10-11	21.8	8.5	13.2269	0
2017-10-12	24	7.5	13.7358	0
2017-10-13	22.8	9.5	15.17	0
2017-10-14	22.5	9.8	15.0608	0
2017-10-15	23.3	7.3	13.9225	0
2017-10-16	25.8	9	15.6733	0
2017-10-17	26	9	15.3683	0
2017-10-18	25.3	10.3	15.9575	0
2017-10-19	20.5	7	12.5358	0
2017-10-20	23	6.8	12.4084	0.2
2017-10-21	16.5	6	9.81667	0
2017-10-22	14	7.8	9.79333	19
2017-10-23	8.8	6.5	7.49083	23.8
2017-10-24	16.5	8.3	10.7233	0
2017-10-25	17	4.3	10.3825	0
2017-10-26	20.8	5	11.0658	0
2017-10-27	14.8	7.5	9.20672	1.4
2017-10-28	12	5.5	8.865	0
2017-10-29	16.8	5.5	8.7675	4
2017-10-30	10	0.5	6.04833	0.2
2017-10-31	9.3	2.8	5.4725	0
2017-11-01	15	-0.2	6.74417	0
2017-11-02	15.8	2.5	8.44333	0
2017-11-03	18	5	9.98992	0
2017-11-04	18	2.3	8.39667	0
2017-11-05	16.5	4.8	8.96417	0
2017-11-06	10.3	4.5	7.71333	0
2017-11-07	13.5	6.5	9.14333	0
2017-11-08	8.5	6.5	7.49583	0
2017-11-09	15.3	5	7.85667	0
2017-11-10	14	4.8	7.93697	0
2017-11-11	9.5	4	6.40333	0
2017-11-12	10.5	3.8	7.29833	0
2017-11-13	10.5	3	4.92	0
2017-11-14	7.8	-0.5	3.9625	0
2017-11-15	9.5	-0.5	3.52667	0
2017-11-16	5.8	3.8	4.4025	0
2017-11-17	5	3.3	4.16555	0
2017-11-18	7.8	0.8	4.23917	0
2017-11-19	7.3	-1.2	1.57083	0
2017-11-20	10	-1.2	4.22333	0
2017-11-21	7	2	4.65417	0
2017-11-22	17.3	4.3	8.42333	0
2017-11-23	14	3	6.63667	0
2017-11-24	3.8	2.3	3.04034	0
2017-11-25	10.5	2.5	5.9975	0
2017-11-26	7.5	2	4.735	0
2017-11-27	8.8	-2.5	2.6775	0
2017-11-28	7.5	-3.2	1.63083	0
2017-11-29	2.8	1	1.74417	0
2017-11-30	3.8	-0.2	1.28167	0
2017-12-01	6.8	-1.7	1.50336	0
2017-12-02	3.3	-5.2	-1.88417	0
2017-12-03	2	-3	-1.06417	0
2017-12-04	1.3	-4.5	-1.05833	0
2017-12-05	3.3	-0.7	1.26833	0
2017-12-06	9	-1.7	3.05	0
2017-12-07	5.5	-5	-1.04417	0
2017-12-08	10.3	0	4.71849	0
2017-12-09	3	-2.7	0.805	0
2017-12-10	3.3	-4.2	-0.0075	0
2017-12-11	11.8	2.5	7.86667	0
2017-12-12	13.5	1.3	9.49333	0
2017-12-13	5.5	-0.2	2.21176	0
2017-12-14	6.8	1.3	3.38417	0
2017-12-15	10	2	4.93417	0
2017-12-16	7.3	0.8	2.9275	0
2017-12-17	6.5	-0.7	2.1675	0
2017-12-18	2.3	-1.7	-0.1725	0
2017-12-19	3.5	-3.7	-1.2475	0
2017-12-20	0.5	-1.7	-0.8775	0
2017-12-21	2	-3	0.203333	0
2017-12-22	7.3	0.8	3.92667	0
2017-12-23	7.5	2.5	4.55	0
2017-12-24	12.3	0	5.57	0
2017-12-25	10.8	-2.5	3.225	0
2017-12-26	11.8	2.3	6.42583	0
2017-12-27	12	3.8	8.05966	0
2017-12-28	10	-1	4.89417	0
2017-12-29	5.8	-3	1.205	0
2017-12-30	4	-3.5	0.463333	0
2017-12-31	10.5	0.5	4.41167	0

## Sheet: 2018
Date	Temperature			Rainfall
	Max.	Min.	Mean
2018-01-01	9.8	3.8	6.22333	0
2018-01-02	6.3	-0.5	4.12667	0
2018-01-03	5.3	-2.2	2.1675	0
2018-01-04	7	0.3	3.8425	0
2018-01-05	11.3	3.5	7.13583	0
2018-01-06	14.5	7	10.1567	0
2018-01-07	14	2.8	7.55	0
2018-01-08	5.5	3	4.61167	0
2018-01-09	5.5	0.2	3.6825	0
2018-01-10	3.5	1.3	2.32917	0
2018-01-11	5.3	2.3	3.75333	0
2018-01-12	4.5	2.3	3.49244	0
2018-01-13	3.5	-0.2	1.45	0
2018-01-14	2.5	-2.2	-0.4475	0
2018-01-15	-2.2	-3.7	-2.98917	0
2018-01-16	3.5	-3.2	-0.670833	0
2018-01-17	5	0	1.87167	0
2018-01-18	7	-0.7	3.04874	0
2018-01-19	6.3	1.3	3.945	0
2018-01-20	7.3	-1.7	1.6525	0
2018-01-21	3	-0.5	0.94	0
2018-01-22	4.8	-2.5	0.218333	0
2018-01-23	4.3	-0.7	1.16833	0
2018-01-24	7.3	-0.2	3.305	0
2018-01-25	6.3	-0.2	2.055	0
2018-01-26	8.8	1	3.61008	0
2018-01-27	3.3	-3	1.1275	0
2018-01-28	3.3	-0.7	1.84833	0
2018-01-29	11.8	0.8	4.28	0
2018-01-30	12	0	5.4075	0
2018-01-31	9.3	-1.2	3.705	0
2018-02-01	10.5	4.3	7.62333	0
2018-02-02	4	0.5	1.81933	0
2018-02-03	2.8	-0.7	1.035	0
2018-02-04	8	0.3	2.83417	0
2018-02-05	5.8	-3.2	1.17	0
2018-02-06	1.3	-2.2	-0.5425	0
2018-02-07	2	-1.7	-0.055	0
2018-02-08	1.3	-0.5	0.195833	0
2018-02-09	3.3	-2.2	0.610084	0
2018-02-10	1.3	-0.2	0.4675	0
2018-02-11	5	-3	0.363333	0
2018-02-12	1	-2	-0.566667	0
2018-02-13	1.3	-1	0.105	0
2018-02-14	1.8	-1.2	-0.145	0
2018-02-15	5.3	-2.7	0.0933333	0
2018-02-16	5.8	-3	0.851261	0
2018-02-17	2.5	-2.2	0.3	0
2018-02-18	3.3	-1.2	0.646667	0
2018-02-19	3	-1.5	0.540833	0
2018-02-20	0.3	-2	-0.976471	0
2018-02-21	0.3	-1.7	-1.09917	0
2018-02-22	-0.2	-2.2	-0.98	0
2018-02-23	0.8	-2	-1.01083	0
2018-02-24	0.5	-6.7	-3.42917	0
2018-02-25	-2	-11.5	-7.62167	0
2018-02-26	-7	-13	-9.47	0
2018-02-27	-7.2	-11.2	-9.94583	0
2018-02-28	-4.5	-14	-10.525	0
2018-03-01	-6.2	-15.5	-9.85917	0
2018-03-02	-4.7	-8.5	-6.22773	0
2018-03-03	-0.2	-6	-3.06917	0
2018-03-04	2.5	-2.7	-1.21167	0
2018-03-05	-0.5	-6.2	-2.96083	0
2018-03-06	3.3	-1.2	0.241667	0
2018-03-07	8.5	-1.5	2.26333	0
2018-03-08	10	1	4.51417	0
2018-03-09	12.3	1.3	6.21345	0
2018-03-10	13.5	2.5	8.0075	0
2018-03-11	15.5	3.8	10.415	0
2018-03-12	15.3	7.5	11.0242	0
2018-03-13	16.3	5	10.2308	0
2018-03-14	10.8	4.8	7.67479	0
2018-03-15	12.8	3.3	7.79583	0
2018-03-16	7.8	4.5	6.18833	0
2018-03-17	6.3	-0.2	4.13	0
2018-03-18	-0.5	-4.5	-2.44417	0
2018-03-19	-1.7	-4.2	-3.26417	0
2018-03-20	3.3	-5.5	-1.51917	0
2018-03-21	5.3	-2.7	0.3325	0
2018-03-22	5.3	-3.7	0.288333	0
2018-03-23	8.5	-2	2.94454	0
2018-03-24	5.5	-0.7	2.61667	0
2018-03-25	4.5	-1.7	1.635	0
2018-03-26	8.3	0	4.3425	0
2018-03-27	11.8	1.8	6.55917	0
2018-03-28	13	0.5	6.37	0
2018-03-29	9.8	6.3	7.62941	11.8
2018-03-30	13.8	5	8.865	2.2
2018-03-31	14.3	6	9.24583	20.6
2018-04-01	13.8	5.8	9.23333	0
2018-04-02	15	5	10.0417	0
2018-04-03	18	7.8	12.7608	0
2018-04-04	16.3	10	12.8367	0
2018-04-05	17	10.5	13.2417	0
2018-04-06	14.3	7.5	10.9866	0
2018-04-07	11.5	5	8.08417	0.6
2018-04-08	21.5	6.5	13.1483	0
2018-04-09	23.8	10.3	15.7567	0.2
2018-04-10	18	10	12.9942	0.2
2018-04-11	21	8.8	15.0825	0
2018-04-12	24	11.5	17.4367	10.2
2018-04-13	20	11.5	15.4714	1
2018-04-14	22.5	8.8	16.2925	0
2018-04-15	21.5	15	17.5725	0
2018-04-16	19.3	14.5	16.9542	0
2018-04-17	19.5	12.5	15.5075	3.6
2018-04-18	21.5	11	16.8275	0
2018-04-19	24.3	12	18.5217	0
2018-04-20	24.5	12	18.5933	0
2018-04-21	24.3	10.5	18.5292	0
2018-04-22	27.5	10.3	18.71	0
2018-04-23	26	13.3	20.2875	0
2018-04-24	24.5	15	18.8925	1.4
2018-04-25	26.5	12.8	20.0358	0
2018-04-26	22	8.5	15.0092	5
2018-04-27	21	8.8	14.4849	0
2018-04-28	27.3	11.8	19.625	0
2018-04-29	29	14.8	22.2558	0
2018-04-30	27.3	16.3	21.2458	0
2018-05-01	24	13.3	18.875	0
2018-05-02	28.5	15.5	21.2108	13.2
2018-05-03	27	14.8	21.8633	0
2018-05-04	27.5	17.5	22.8235	0
2018-05-05	25.8	14.8	19.7092	0.4
2018-05-06	24	12.3	18.3058	0
2018-05-07	25.5	13.8	19.7475	0
2018-05-08	23.8	12.8	18.8242	0
2018-05-09	26	10.8	19.5067	0
2018-05-10	26	15.8	19.7792	0
2018-05-11	25.8	14.3	19.85	23.4
2018-05-12	28	14.5	20.8975	0
2018-05-13	19	12.3	16.075	1.4
2018-05-14	19	12.3	15.9083	1.8
2018-05-15	19	8.8	13.4133	18.4
2018-05-16	20.8	8	14.5517	0
2018-05-17	20.8	11.5	15.2017	15.6
2018-05-18	23	13.3	17.3225	0
2018-05-19	23	12	17.4417	0
2018-05-20	25	13.3	18.8167	0
2018-05-21	24.5	14.8	19.4558	0
2018-05-22	26	13.8	19.0417	8.6
2018-05-23	27.5	15.5	21.3225	0
2018-05-24	28.3	16.3	21.0342	1.6
2018-05-25	24.3	15.3	19.3252	2.4
2018-05-26	27.8	14	21.2842	0
2018-05-27	30.5	16.3	23.6417	0
2018-05-28	30.8	19	24.38	0
2018-05-29	30.5	19.5	24.1917	0
2018-05-30	30.3	19.3	23.1933	0
2018-05-31	32.8	18	25.0758	0
2018-06-01	33	18.5	24.9882	0
2018-06-02	31	19.3	25.1492	0
2018-06-03	31	19.3	24.145	0
2018-06-04	30	18	24.125	0
2018-06-05	30.5	18	23.5683	0
2018-06-06	30.5	16.3	22.3808	13.2
2018-06-07	29.3	16.3	22.1517	11.6
2018-06-08	29.8	16.5	23.6504	7.2
2018-06-09	26	16.8	20.9467	8.4
2018-06-10	31	19	23.5933	0
2018-06-11	33.5	18.5	25.7175	0
2018-06-12	34.3	16	24.8692	7.8
2018-06-13	24.5	15.8	19.0233	0.4
2018-06-14	17.8	12.5	14.4283	8.6
2018-06-15	24	13	17.5958	0.6
2018-06-16	28	16.5	21.51	0.2
2018-06-17	31	17.5	24.2533	0
2018-06-18	27.5	18.3	22.3408	0
2018-06-19	30.3	18.3	23.795	0
2018-06-20	32.3	19.8	25.6275	0
2018-06-21	33	17.8	26.0433	0
2018-06-22	20	13	16.2846	3.2
2018-06-25	23.8	13	17.5767	4.4
2018-06-26	26.5	14.3	19.5242	0
2018-06-27	24.5	12.8	16.895	2.4
2018-06-28	25.8	13.3	18.2617	8.6
2018-06-29	27.3	16.8	20.5361	24.4
2018-06-30	27.8	12.8	20.8758	0
2018-07-01	24.5	12	17.5733	0
2018-07-02	27.3	10.3	19.185	0
2018-07-03	29.8	14.3	22.4008	0
2018-07-04	28	18	22.1692	0
2018-07-05	31.8	15	23.5783	0
2018-07-06	25.8	16	20.9588	10
2018-07-07	28	16.8	21.1892	0
2018-07-08	29.3	16.5	22.0242	0
2018-07-09	30.8	17.3	23.245	0
2018-07-10	31.3	15.3	23.1917	0
2018-07-11	23.8	15.3	17.0383	18.2
2018-07-12	28.3	14.3	20.4639	0
2018-07-13	29.3	14.8	22.1367	0
2018-07-14	31.8	16	23.4433	0
2018-07-15	30	16.3	23.1183	0
2018-07-16	31.5	15	22.8967	0
2018-07-17	30.8	17.8	22.9017	0.6
2018-07-18	30.5	17	22.4192	0
2018-07-19	32.5	19.3	24.1479	0
2018-07-20	32.8	19.3	24.2508	0
2018-07-21	33.5	17.3	24.6142	12.4
2018-07-22	30	17	21.5258	1
2018-07-23	28.3	17.3	20.5571	4.4
2018-07-24	32	19	25.1183	0
2018-07-25	33.3	20.5	25.7508	0
2018-07-26	32.5	19.8	25.0542	0
2018-07-27	30.8	19.3	23.9275	0
2018-07-28	33	18.3	23.6758	0.6
2018-07-29	34.3	18.8	27.3783	0
2018-07-30	34.8	21.3	27.8583	0
2018-07-31	35	20.3	27.5075	0
2018-08-01	32.3	20.8	25.7597	2
2018-08-02	31.5	20.5	24.905	0.2
2018-08-03	34	19.8	25.2133	0
2018-08-04	35	21	26.8558	0
2018-08-05	35	19.3	26.185	0
2018-08-06	33.5	19.5	26.5167	0
2018-08-07	34.8	21.3	27.005	0
2018-08-08	34.5	20.8	27.4183	0
2018-08-09	37	22.3	28.6567	0
2018-08-10	34.8	18	26.6429	12
2018-08-11	28.5	16.8	21.2125	0.6
2018-08-12	34.3	19.3	25.0317	0
2018-08-13	33.3	17.8	25.5658	0
2018-08-14	30.5	17.5	21.5158	8.6
2018-08-15	29	17.5	22.8143	0.2
2018-08-16	33	16	23.4142	0
2018-08-17	33	16.5	24.2158	0
2018-08-18	35.5	18.8	25.5742	0
2018-08-19	34.8	18	25.6092	0
2018-08-20	36.3	18.3	26.2033	0
2018-08-21	34.3	19.5	26.6933	0
2018-08-22	35.5	21	26.8325	0
2018-08-23	36.5	21	26.4192	0
2018-08-24	34.5	20	24.9185	0
2018-08-25	25.5	13.8	20.1475	3
2018-08-26	14.5	11.5	13.0608	15.4
2018-08-27	25	10.8	16.8983	0
2018-08-28	30.3	10.5	19.6258	0
2018-08-29	31.3	14	21.4133	0
2018-08-30	32.5	15.5	22.4933	0
2018-08-31	31.3	16.5	22.5655	0
2018-09-01	26.3	16	20.19	10.4
2018-09-02	23.5	15	18.3267	7.4
2018-09-01	26.3	16	20.3	15.5
2018-09-02	23.5	15	18.3	8
2018-09-03	25.5	16.3	19	70
2018-09-04	18	15	16.3	10
2018-09-05	27	15.2	20.5	0
2018-09-06	29.5	14.5	20.5	0
2018-09-07	29.7	13.5	21	0.2
2018-09-08	29	14.5	21.5	0
2018-09-09	29.2	13.5	20.8	0
2018-09-10	29.7	12.7	20.3	0
2018-09-11	30.8	13	21	0
2018-09-12	32.8	14.2	22	0
2018-09-13	33.3	14.2	22.2	0
2018-09-14	26.7	16.5	19.2	0
2018-09-15	27.2	15.8	20.5	0
2018-09-16	31.3	14.5	21.5	0
2018-09-17	31.7	15	21	0
2018-09-18	32.8	15	21.5	0
2018-09-19	32.2	14	21	0
2018-09-20	32.5	14	21.5	0
2018-09-21	33.3	14	21.5	0
2018-09-22	18.8	11.5	13.5	0
2018-09-23	21.7	11.3	15.2	10
2018-09-24	19	5.3	12.7	1
2018-09-25	17.5	4.3	9.8	0
2018-09-26	20.3	3.8	11.7	0
2018-09-27	22.2	4.8	12.3	0
2018-09-28	25.8	5.8	14	0
2018-09-29	23.7	6.3	13.4	0
2018-09-30	22.5	6.8	12.7	0
2018-10-01	22.5	5.5	12.3	0
2018-10-02	16.5	5.8	9.8	0
2018-10-03	20.5	5.3	11.7	0
2018-10-04	22.2	6	13	0
2018-10-05	24.7	8	14.2	0
2018-10-06	21.5	9	15	0
2018-10-07	20	11	15	0
2018-10-08	22.5	11.5	16.5	0
2018-10-09	28.5	9	16.5	0
2018-10-10	28.5	9	16.5	0
2018-10-11	26	10.5	17	0
2018-10-12	25.8	10.5	16.7	0
2018-10-13	26.5	9.8	16.7	0
2018-10-14	25.5	11	16.3	0
2018-10-15	24.2	9.5	15	0
2018-10-16	16.7	9	13	0
2018-10-17	23.5	10.8	15.8	0
2018-10-18	23.8	10.8	15	0
2018-10-19	24.5	9.8	14.8	0
2018-10-20	21	8.8	13	0
2018-10-21	16.3	5.8	10.2	0
2018-10-22	15	8.5	10.8	0
2018-10-23	18	7.5	12	0.3
2018-10-24	18.3	5	9.5	1.5
2018-10-25	17.3	3	8.5	5
2018-10-26	17	6	10.8	0
2018-10-27	18	8.3	13.3	0
2018-10-28	25.8	6.3	14.2	15
2018-10-29	26.7	12.3	17.7	0.3
2018-10-30	22.5	11.3	17	0
2018-10-31	26.7	6.5	14.2	0
2018-11-01	19.8	8.8	13	0
2018-11-02	21.5	8.5	14	1
2018-11-03	19.5	10.8	14.5	0
2018-11-04	18	7.8	11.3	0
2018-11-05	17.7	7.5	11.5	0
2018-11-06	17.1	7	11.6	0
2018-11-07	17	1.5	6.8	0
2018-11-08	18.3	7.5	11.3	0
2018-11-09	15.8	5.8	9.3	0
2018-11-10	10.8	4.5	7	0
2018-11-11	20.5	7.3	12.5	0
2018-11-12	21.7	8.3	13.3	0
2018-11-13	19.5	8.3	12.5	0
2018-11-14	17	7	11	0
2018-11-15	16	1.8	8.5	0
2018-11-16	12.7	4.5	7.5	0
2018-11-17	10	1.3	4.3	0
2018-11-18	8	0.8	3.3	2.5
2018-11-19	1.8	0.5	1.5	1.7
2018-11-20	3.3	1.3	2.3	4.2
2018-11-21	4	3.3	3.5	1.2
2018-11-22	4.8	3.5	4	1.6
2018-11-23	6	3.5	4.5	0
2018-11-24	7.3	3.5	4.5	2
2018-11-25	6	4	5	19
2018-11-26	7	3	5.5	20
2018-11-27	2.8	-1.3	0.3	0.5
2018-11-28	5.3	-3.3	-0.3	0
2018-11-29	2.8	-4.5	-2	0
2018-11-30	0.8	-6	-3.3	0
2018-12-01	-0.8	-4.3	-2.8	0
2018-12-02	4.5	-4.3	-0.5	0
2018-12-03	4.3	0.5	2	0
2018-12-04	11.3	1.8	5.3	0.2
2018-12-05	8.5	-3.3	2.8	0
2018-12-06	1.5	-4.3	-0.5	0
2018-12-07	8	0.3	3.3	3
2018-12-08	7.8	0.5	4.8	0
2018-12-09	7.5	-0.3	2.8	0.5
2018-12-10	11	-1.5	3.8	0.2
2018-12-11	3.8	-1.8	1.5	0.8
2018-12-12	3.3	-3	0.8	0.6
2018-12-13	1.3	-4.5	-2	0
2018-12-14	0	-3	-1.8	5
2018-12-15	-1	-3.5	-2	2
2018-12-16	0	-5.3	-2.8	0
2018-12-17	0.3	-5	-2.8	0
2018-12-18	2.8	-4	-1.3	0
2018-12-19	-1.5	-5.3	-3.5	0
2018-12-20	-2.8	-5.8	-4.3	0
2018-12-21	4	-3.3	-0.3	0
2018-12-22	11	3.5	6.5	0
2018-12-23	10.8	3.3	6.3	0
2018-12-24	7.8	1	4.3	0
2018-12-25	3	-0.5	1.3	3
2018-12-26	6.5	-0.8	2.5	0
2018-12-27	6.8	-0.3	2.5	0
2018-12-28	6	-2.3	1.5	0
2018-12-29	9	2.3	4.3	0
2018-12-30	4.8	0	2.5	3.2
2018-12-31	7	-0.8	3.5	0

## Sheet: 2019
Date	Temperature			Rainfall
	Max.	Min.	Mean
2019-01-01	4.8	-4.5	0	3.2
2019-01-02	6.3	-1	1.5	0.5
2019-01-03	3.3	-4.8	-1.8	1.7
2019-01-04	1.3	-5.3	-3	4.7
2019-01-05	2	-3.8	-2	10
2019-01-06	4	-1	1	0
2019-01-07	2.8	-5.3	-2	0.1
2019-01-08	-1	-3.5	-2.5	1.5
2019-01-09	5.3	-2.3	0.3	0
2019-01-10	0.8	-2.5	-0.8	0
2019-01-11	2.5	-4.8	-1.3	0.1
2019-01-12	2	-3.8	-1	0
2019-01-13	9	-1	3.3	0.1
2019-01-14	9.5	-0.3	3.8	0
2019-01-15	6.5	-4.3	1	0
2019-01-16	10.5	0.5	4	0
2019-01-17	12.3	2.5	6.3	10.7
2019-01-18	6.8	-2.3	2	0.5
2019-01-19	1	-3.8	-1.3	2
2019-01-20	2.5	-2.8	-1.5	0
2019-01-21	2.3	-5.8	-2	0
2019-01-22	-1.3	-4.8	-3.5	3.5
2019-01-23	-2.3	-5.3	-3.5	0
2019-01-24	-0.5	-4.3	-2.8	0
2019-01-25	-0.3	-5	-2.8	0
2019-01-26	-1	-5.3	-2.5	0
2019-01-27	3.3	-5.3	-0.3	0.2
2019-01-28	3	-0.8	1	4.8
2019-01-29	6.5	-2.3	0.8	0
2019-01-30	-0.5	-6	-2.8	0
2019-01-31	-0.8	-3	-1.8	0
2019-02-01	7.8	-1.3	3	0
2019-02-02	14	6.8	10.2	0
2019-02-03	12	0.8	6.3	5
2019-02-04	6.3	-3.3	2	0.1
2019-02-05	1	-2.8	0	0.9
2019-02-06	6	-3.8	0.5	0
2019-02-07	7.8	-7.3	-0.5	0
2019-02-08	6.3	-3	0.3	0
2019-02-09	5.3	-3	-0.5	0
2019-02-10	10.2	-2.3	2.5	14
2019-02-11	7.5	2.8	4.5	0.4
2019-02-12	6.8	0.3	2.8	0
2019-02-13	6.3	-0.3	2.5	0
2019-02-14	11.7	0.5	6	0
2019-02-15	9.8	-1.5	4.3	0
2019-02-16	12	-3.8	3.8	0
2019-02-17	15	-2	5.3	0
2019-02-18	15.2	-1.8	6.3	0
2019-02-19	12.5	2	6.8	0
2019-02-20	13.3	0.5	7.3	0
2019-02-21	13.3	-1.8	6	1.5
2019-02-22	11.5	-2.3	5.5	0.4
2019-02-23	3.5	-6	-1.8	0
2019-02-24	2.5	-5.3	-1	0
2019-02-25	9.5	-3	3	0
2019-02-26	17.3	0.8	9.8	0
2019-02-27	14.2	2.3	7.8	0
2019-02-28	19.2	1.8	10	0
2019-03-01	17	6.8	11.7	0
2019-03-02	8.8	3.3	5.8	0.6
2019-03-03	15	3	7.8	0
2019-03-04	17.3	4.8	10	4
2019-03-05	13.8	2.3	7.8	0
2019-03-06	15	5.8	9.8	0
2019-03-07	18.5	7.8	13	0
2019-03-08	16.3	8.5	11.5	0
2019-03-09	14.8	6.3	10	0
2019-03-10	13	6.3	10	0
2019-03-11	12	-0.3	6.3	5
2019-03-12	10.2	-0.8	4.5	0
2019-03-13	11.7	-0.5	4.3	0
2019-03-14	12.5	-0.3	6.3	0
2019-03-15	14	4.8	8.5	0.2
2019-03-16	11	6.3	8.8	0
2019-03-17	19	5.8	12.5	0
2019-03-18	12	4.3	7	0.1
2019-03-19	10.8	3.5	6.3	0
2019-03-20	12.5	1.8	6.8	0
2019-03-21	12	2	7.5	0
2019-03-22	16.3	0.5	9.3	0
2019-03-23	18.3	4	11.3	0
2019-03-24	21.3	4	13	0.8
2019-03-25	15.2	5.8	10	0
2019-03-26	11.3	2.8	7	0
2019-03-27	11.7	2.3	7.3	0
2019-03-28	13.5	4.5	9.3	0
2019-03-29	14.8	5.8	10.8	0
2019-03-30	18.8	2.5	10.8	0
2019-03-31	20.5	4	13	0
2019-04-01	18.8	8.5	14.2	0
2019-04-02	17.7	7	12	0
2019-04-03	19	7	12.7	2.3
2019-04-04	18.5	8	13.5	0
2019-04-05	13.5	6.5	9.8	15
2019-04-06	14.2	5.3	9	0
2019-04-07	17.5	5.8	11	0
2019-04-08	20.3	9.3	14.8	2
2019-04-09	21	10.8	15	0
2019-04-10	18	8.8	12.7	9.5
2019-04-11	8.8	4.8	6	2
2019-04-12	8.3	4	5.8	2
2019-04-13	6	3	4.5	1.5
2019-04-14	9.3	3.3	6	0.5
2019-04-15	16	6.3	11.3	0
2019-04-16	16.7	5.3	10.5	0
2019-04-17	17.7	6.3	12	0
2019-04-18	18.3	8.5	13.3	0
2019-04-19	22.5	6.5	15.2	0
2019-04-20	20.3	10.2	15.2	0
2019-04-21	22	8.3	15.2	0
2019-04-22	22.8	7.3	15.2	0
2019-04-23	13.8	9.8	11.5	0.1
2019-04-24	23.5	9.8	16	0.4
2019-04-25	24	12.5	18.3	0
2019-04-26	26.5	13.5	19.5	1
2019-04-27	18.5	9	13.5	0
2019-04-28	17.5	9.3	13.3	0
2019-04-29	12.5	6.5	9.5	0
2019-04-30	16	8.3	11	0.3
2019-05-01	20.3	10.5	15	0
2019-05-02	24	9.8	16.7	0
2019-05-03	19.2	9.5	13.3	11.8
2019-05-04	13.3	9.3	10.5	19.8
2019-05-05	10.2	3.3	4.5	14.5
2019-05-06	8.3	3	5.5	0.5
2019-05-07	14.8	4.8	9.8	0
2019-05-08	17.3	3.3	11.7	0
2019-05-09	13.5	8.3	10.8	3.5
2019-05-10	19.8	6.8	12.7	1.5
2019-05-11	21.7	7.8	15.5	11
2019-05-12	17.5	9	12	12.5
2019-05-13	10.8	6.5	8	3.7
2019-05-14	8.5	5	6.5	4.5
2019-05-15	7	5.3	6	15.5
2019-05-16	11.3	5.3	8.3	0
2019-05-17	15.8	6.5	11.1	0
2019-05-18	21.7	8.5	15.2	3.4
2019-05-19	22	11.5	16.3	0
2019-05-20	19.8	11	15	0
2019-05-21	20.8	9.5	14.8	0
2019-05-22	19.2	12	15	0.2
2019-05-23	20.3	12	14.8	0
2019-05-24	23.3	10.5	17	0
2019-05-25	25.5	13.8	19.8	0
2019-05-26	27.5	12.5	20.3	0
2019-05-27	19.5	14.2	16.5	1.2
2019-05-28	23.3	14.5	17.5	0.5
2019-05-29	16.7	10.2	13.3	24.7
2019-05-30	12.5	8.8	10	4
2019-05-31	22.5	9.5	16.3	0
2019-06-01	26.7	14.8	21	0.2
2019-06-02	25.5	15.2	19.8	3
2019-06-03	28.5	14.2	22	0
2019-06-04	28.5	17.3	22.2	0.7
2019-06-05	27	16	19.8	0.3
2019-06-06	26.7	16.3	20.8	0
2019-06-07	28	16.3	22	0
2019-06-08	26.7	16	22.2	0
2019-06-09	29.2	18.8	23.3	0
2019-06-10	31.7	18.5	25.5	0
2019-06-11	32.2	21.3	26.7	0
2019-06-12	31.5	20.5	26.3	0
2019-06-13	33	21.3	27	0
2019-06-14	32.8	15.8	25.5	0
2019-06-15	33.8	20.3	26.7	0
2019-06-16	31.5	19.5	24.5	0
2019-06-17	29.2	17.7	22.5	0
2019-06-18	31.3	19.5	24.5	0
2019-06-19	30	16.7	21.5	8.5
2019-06-20	31	15.8	23.3	0
2019-06-21	31	18.8	24.2	0
2019-06-22	30.3	16.7	23	10.9
2019-06-23	26.3	16.7	19.5	5
2019-06-24	30	18.3	24	0
2019-06-25	32.2	20.5	26.3	0
2019-06-26	34.2	20.5	27.8	0
2019-06-27	35.5	21.3	28	0
2019-06-28	28.8	19.2	23.3	0
2019-06-29	29.2	17.5	23.3	0
2019-06-30	30.8	16.5	24.5	0
2019-07-01	35	18	27.2	0
2019-07-02	32.5	20.3	16.7	0
2019-07-03	30.8	19.2	25.3	0
2019-07-04	28.3	17.7	22.5	0
2019-07-05	31.3	16	22.5	8
2019-07-06	33.3	17.3	26	0.2
2019-07-07	33	14.8	22.8	7
2019-07-08	23	13.8	17.5	3.8
2019-07-09	25	14.5	19.5	0
2019-07-10	25.5	14.2	19	0
2019-07-11	27.5	11.5	21	0
2019-07-12	26	16.5	19.8	0.1
2019-07-13	24	15	18.3	1.6
2019-07-14	28.8	15	20	0
2019-07-15	28.3	15.7	22	0
2019-07-16	29.5	16.3	23	0
2019-07-17	28.3	15.2	22.5	0
2019-07-18	27	16.7	21.3	5
2019-07-19	32	14	23.3	0
2019-07-20	33.3	16.7	25.5	0
2019-07-21	32.2	17	25.3	0
2019-07-22	34	19.8	26	0
2019-07-23	33.5	18.8	26.7	0
2019-07-24	34.5	19.5	27	0
2019-07-25	36	19.5	28	0
2019-07-26	30.5	20.3	25	0
2019-07-27	33.5	15.8	23.5	47
2019-07-28	25.3	16.5	20.5	8.3
2019-07-29	28.3	17.5	22.2	0
2019-07-30	32.2	18.8	26	0
2019-07-31	33.3	17.7	26.5	10.3
2019-08-01	30.3	18	23.8	0
2019-08-02	27.5	15.5	19.5	20
2019-08-03	27.2	15.2	20.8	0
2019-08-04	27.8	15.2	20.8	0
2019-08-05	29.7	13.8	22.2	0
2019-08-06	32	17.7	24.2	0
2019-08-07	32.2	18.3	25.5	0
2019-08-08	29.2	18.3	21.7	0
2019-08-09	30.5	16	24	0
2019-08-10	35.5	18.3	27.2	0
2019-08-11	32	20.3	25.3	0
2019-08-12	35	18.8	27.2	0
2019-08-13	26.7	15.2	21.3	23
2019-08-14	25.3	13.3	18	0
2019-08-15	27	14.8	20.5	0
2019-08-16	25.5	14.5	20	0.2
2019-08-17	29	13	21.5	0
2019-08-18	31.5	16.3	23.5	0
2019-08-19	32.8	17	25	0
2019-08-20	34.7	19	27	0
2019-08-21	26	16.7	21	0
2019-08-22	28.8	15.2	21.7	0.5
2019-08-23	33	19.8	25.8	0
2019-08-24	31.7	21.5	25.5	0.1
2019-08-25	30.5	19.8	24.2	0
2019-08-26	27.2	18.3	22.2	0.8
2019-08-27	32.5	18.5	25.3	0
2019-08-28	34	20	26.3	0
2019-08-29	33.8	20	26	0
2019-08-30	35.3	20	26.7	0
2019-08-31	34	19.2	26.5	0
2019-09-01	35.8	18.8	26.5	0
2019-09-02	28.5	14.5	21.5	1.1
2019-09-03	25.3	12.3	17	0
2019-09-04	28	11.3	20	0
2019-09-05	29.2	11	20.5	0
2019-09-06	22	14.2	18	0.2
2019-09-07	25	13.5	17.3	22.5
2019-09-08	23	12.7	17.3	5.5
2019-09-09	23.3	10.8	15.8	1.5
2019-09-10	24.2	9.3	17	0
2019-09-11	26.7	12.3	18.8	0
2019-09-12	26.5	16.5	21.3	0
2019-09-13	28.5	16.7	21.7	0
2019-09-14	27.5	13.8	20.5	0
2019-09-15	27.5	12.7	19.5	0
2019-09-16	30.8	13.3	20.8	0
2019-09-17	23.8	14.2	19.5	8.5
2019-09-18	21.5	9.8	15	0
2019-09-19	20.5	5.8	13.3	0
2019-09-20	21.5	5.5	13	0
2019-09-21	23	6	14	0
2019-09-22	25.8	6.8	16.3	0
2019-09-23	27.2	14.2	18.8	0
2019-09-24	24.5	12.5	17.5	0
2019-09-25	22.5	10.8	15.8	1.9
2019-09-26	23.3	11.7	16.5	0.3
2019-09-27	26.3	10.2	17.7	0
2019-09-28	24.5	12	16.5	0
2019-09-29	23	13.5	16.7	0
2019-09-30	26.7	12	16.7	0
2019-10-01	26.3	14.2	19.2	0
2019-10-02	25.5	12	16	8
2019-10-03	17.3	7.3	10.8	0
2019-10-04	19.2	5.3	11.5	0
2019-10-05	20	7	11.7	0
2019-10-06	18.3	5.3	10.2	0
2019-10-07	10.8	3.5	7.8	0
2019-10-08	17.3	2.3	9.3	0
2019-10-09	23.5	7	14.5	1.4
2019-10-10	12.7	7.3	10.5	2.8
2019-10-11	17	6.3	10.2	0
2019-10-12	22.2	6.3	12.7	0
2019-10-13	25	9.5	15.5	0
2019-10-14	23.8	10.2	15.5	0
2019-10-15	25.3	10.2	16.7	0
2019-10-16	17.7	7.8	12.5	0.4
2019-10-17	22.8	6.3	12.7	9
2019-10-18	23.5	7.5	14	0
2019-10-19	24.2	7.8	15.2	0
2019-10-20	24.5	11.7	17.3	0
2019-10-21	26.5	12.7	18.8	0
2019-10-22	24.7	11	16.5	0
2019-10-23	24	11.5	16.5	0
2019-10-24	24.3	11.2	16.5	0
2019-10-25	26	9.5	15.8	0
2019-10-26	25	7	14.2	0
2019-10-27	19	7.3	11.5	0
2019-10-28	17.7	8	11.3	0.3
2019-10-29	9.3	5.8	7	8.5
2019-10-30	8.8	3	6	4.2
2019-10-31	12.3	1.5	5.5	0
2019-11-01	13.8	-0.8	6	0
2019-11-02	13.8	4.5	9	0.8
2019-11-03	22	10	14.8	6.3
2019-11-04	14.8	7.5	10.8	20
2019-11-05	20	8.3	11.7	15
2019-11-06	14.8	7.3	10	0.8
2019-11-07	14.8	5.8	9	0
2019-11-08	13	6.8	9.3	9
2019-11-09	12.5	6.8	9.3	3
2019-11-10	7.3	2	5	10
2019-11-11	12.7	0.3	6.5	0
2019-11-12	9.3	1	6.5	4.5
2019-11-13	14	3.3	7	5
2019-11-14	13.5	0	6	0
2019-11-15	12	6	8.3	1
2019-11-16	12	9	10.2	4
2019-11-17	16	8.3	11	0.8
2019-11-18	15	7.3	10.2	0.6
2019-11-19	11.5	7.8	9	0
2019-11-20	9	7.3	8.3	19
2019-11-21	15	7	10	0
2019-11-22	9.5	5.3	8.3	0
2019-11-23	8.3	5	5	0
2019-11-24	7.8	5	5	0
2019-11-25	7.8	5	5	0
2019-11-26	8	6.5	6.5	0
2019-11-27	12.7	7.5	7.5	14.5
2019-11-28	9.8	8.5	8.5	3
2019-11-29	11.3	7.5	7.5	0
2019-11-30	8.3	4	4	0
2019-12-01	5.5	-1.8	2.3	8.9
2019-12-02	1.8	-0.3	0.8	14
2019-12-03	6.8	-2.5	1.8	0
2019-12-04	0	-3.8	-2.5	0
2019-12-05	-1	-2.5	-1.5	0
2019-12-06	-0.8	-1.8	-1.3	0
2019-12-07	0.8	-1.5	-0.5	0
2019-12-08	2.5	-2.8	-0.3	0
2019-12-09	6.3	1	3.3	14.6
2019-12-10	8	0	4	0
2019-12-11	5	-3.3	0.5	0
2019-12-12	1.5	-0.3	0.5	2.5
2019-12-13	5.8	-1.5	1	9
2019-12-14	8.8	0.3	4	0
2019-12-15	9.3	-1	3.8	0
2019-12-16	14.2	3.5	8.3	0
2019-12-17	16.3	8.5	11.3	0
2019-12-18	18	9	11.7	0
2019-12-19	10.8	5	8.3	0
2019-12-20	10.8	2.8	6.3	0
2019-12-21	12	6.5	9.8	11.5
2019-12-22	7.8	3.5	5.3	48
2019-12-23	7.8	4.5	6.5	3.3
2019-12-24	11.3	3	6.8	0.2
2019-12-25	8.5	2.3	5.3	3.5
2019-12-26	9.8	1.8	4.8	0
2019-12-27	6.8	1.8	3.3	0
2019-12-28	4.5	-0.3	1.5	0
2019-12-29	2.5	-2.8	-0.3	0
2019-12-30	3	-5.3	-1	0
2019-12-31	6.3	-3	1.3	0

## Sheet: 2020
Date	Temperature			Rainfall
	Max.	Min.	Mean
2020-01-01	8.3	-1.5	3	0
2020-01-02	6	-4	0.3	0
2020-01-03	-1	-3.8	-3	0
2020-01-04	4.5	-4	-1	0
2020-01-05	5.5	-2.3	2	0
2020-01-06	4	-4.5	-0.8	0
2020-01-07	4	-5	-1	0
2020-01-08	7.5	-3	1	0.7
2020-01-09	8.5	-3.5	0.5	0
2020-01-10	1.5	-3	-1.5	0
2020-01-11	9.5	-2	3.3	0
2020-01-12	7.5	-4	1	0
2020-01-13	-2.5	-4.8	-3.5	0
2020-01-14	-2	-4.2	-3.4	0
2020-01-15	-2.3	-3.5	-2.8	0
2020-01-16	0.8	-3.3	-1.8	0
2020-01-17	-1.5	-3	-2.3	0
2020-01-18	-2	-3.8	-3	0
2020-01-19	0.8	-2.5	-1.3	0.7
2020-01-20	4.3	-3.5	0.5	0
2020-01-21	4.8	-5.5	-2	0.2
2020-01-22	-2.3	-5.8	-4	0
2020-01-23	4.8	-4.8	-0.3	0
2020-01-24	-3	-4.8	-3.8	0
2020-01-25	-2	-3.3	-2.8	0
2020-01-26	-1	-3	-2.3	0
2020-01-27	1.8	-1.8	-1	0.3
2020-01-28	9.3	-1.3	2.8	12
2020-01-29	7.5	-0.8	1.3	0
2020-01-30	9	-1.3	3.3	0
2020-01-31	13.5	1	7.3	0.2
2020-02-01	14.5	3.5	8.8	0
2020-02-02	16	6.5	10.8	0
2020-02-03	13	6	9.8	0.3
2020-02-04	10	3.3	6.5	3.3
2020-02-05	8.3	-0.5	3.3	0
2020-02-06	6.3	-1	2	0
2020-02-07	10.2	1.5	4.3	0
2020-02-08	6	-0.5	1.5	0
2020-02-09	9.3	-1.8	3.5	0
2020-02-10	15.5	3.8	8.5	3
2020-02-11	12.7	4	7.5	0
2020-02-12	11.7	-0.3	5	2.5
2020-02-13	10	-0.8	4.8	0.3
2020-02-14	10	2.8	6.8	0
2020-02-15	11.7	2.5	6.8	0
2020-02-16	11.3	1.8	6.3	0
2020-02-17	16	4.5	9.5	0
2020-02-18	13	1.8	8.8	0
2020-02-19	11.7	0.8	5.5	0.5
2020-02-20	11.3	0.8	5.3	0
2020-02-21	11.7	1	4.8	0
2020-02-22	10.5	0	5.3	0
2020-02-23	12	3.8	7.3	0
2020-02-24	10	4	7.3	0
2020-02-25	15.2	2.3	8.3	9
2020-02-26	9.8	1	4.3	21.2
2020-02-27	9.3	-0.3	4.5	0
2020-02-28	9	0	4.5	0
2020-02-29	10.8	-1.5	5	0
2020-03-01	10.5	6.3	8.3	14
2020-03-02	14.8	5.5	9.5	0
2020-03-03	12.7	4	9	0.3
2020-03-04	10.8	4.3	6.3	3.3
2020-03-05	11.7	-0.5	6	0
2020-03-06	7.3	3.3	4.8	0
2020-03-07	12.3	2.8	7.3	0
2020-03-08	10.8	1	5.5	0
2020-03-09	12.3	-1.5	5.8	0
2020-03-10	14.8	6.3	9.5	3
2020-03-11	18.3	6.5	12	0
2020-03-12	20.3	7.8	14.2	2.5
2020-03-13	11.5	5	7.8	0.3
2020-03-14	12.3	0.5	6.5	0
2020-03-15	8	1	4.3	0
2020-03-16	12.5	0.3	6.8	0
2020-03-17	15.2	2	9.3	0
2020-03-18	18.3	8	13	0
2020-03-19	19.8	4.8	12.5	0
2020-03-20	20.8	5.3	13.3	0
2020-03-21	13	2.8	7.5	3.5
2020-03-22	6	-2.3	2	0
2020-03-23	3.5	-5	-1.3	0.2
2020-03-24	6	-1.8	2.3	0.1
2020-03-25	2.8	-2	0.3	0.2
2020-03-26	11	1	6	0
2020-03-27	15.2	2	9.5	0
2020-03-28	17.7	1.8	10.2	0
2020-03-29	16.7	6.3	11.3	0
2020-03-30	6.8	0.8	3.5	0
2020-03-31	6.5	-1.5	2.8	0
2020-04-01	9	-2.3	3.5	0
2020-04-02	11.3	-2.5	5	0
2020-04-03	16.7	-0.5	8.8	0
2020-04-04	14.8	6.5	11	0
2020-04-05	17.5	6.3	12.3	0
2020-04-06	17.5	7.3	12.5	0
2020-04-07	19.2	7	12.7	0
2020-04-08	20.3	3.5	12.5	0
2020-04-09	22.2	4	13.8	0
2020-04-10	22	9.5	16.3	0
2020-04-11	19.8	9.5	14.8	0
2020-04-12	23.5	8.5	16	0
2020-04-13	23.5	10	15.8	3.5
2020-04-14	10.8	2	6.3	0
2020-04-15	14.2	2.3	8.5	0.2
2020-04-16	20.3	3.8	13	0
2020-04-17	25.8	9	17	0
2020-04-18	22.8	11.3	17	3
2020-04-19	22	11.3	15.8	2.5
2020-04-20	16.3	9.3	12.3	0
2020-04-21	17.5	8	12.5	0
2020-04-22	17.3	8.5	12.7	0
2020-04-23	19.8	9	13.8	0
2020-04-24	21.5	6	14.8	0
2020-04-25	24.2	9	15.5	0
2020-04-26	18.5	9.5	13.3	0
2020-04-27	21.3	8.5	14.5	4.2
2020-04-28	24.7	9.5	16.7	0
2020-04-29	22	11.7	15.5	0.6
2020-04-30	22.2	10.8	16	5.5
2020-05-01	19	9	13.8	3
2020-05-02	21.3	10	15.5	2
2020-05-03	18.5	7.3	12.5	0
2020-05-04	20	9.3	14.5	0.1
2020-05-05	17.7	7.8	11.7	3
2020-05-06	16.7	4.8	10.8	0
2020-05-07	22.5	8.5	15.5	0
2020-05-08	23.8	7.8	16.7	0
2020-05-09	27	11.3	18.3	0
2020-05-10	25	11	18.3	0
2020-05-11	23.5	13	18.5	2.2
2020-05-12	20.1	9.5	14.7	0.2
2020-05-13	20.8	4.3	13.8	0
2020-05-14	19.8	10.8	14.5	0
2020-05-15	18.8	9	12.5	0
2020-05-16	19.2	9.3	14.2	7
2020-05-17	20	9.8	14	2
2020-05-18	25.3	9.8	18	0
2020-05-19	21.3	14.2	17.5	0.6
2020-05-20	22.5	14.2	16.7	0.1
2020-05-21	21.5	10.2	16	0
2020-05-22	22.2	9.5	16.3	0
2020-05-23	22.5	12	16.7	5
2020-05-24	21.7	10	15.5	0.2
2020-05-25	16.7	9	12	6.3
2020-05-26	19.2	8.8	13.3	0
2020-05-27	22.2	9	15	0
2020-05-28	22.2	11	16.3	0
2020-05-29	21.5	10.8	15.2	0
2020-05-30	19	10.8	13.8	0
2020-05-31	14.5	9	10.8	4.4
2020-06-01	24.5	10.2	16.3	0
2020-06-02	23.5	12	17.7	0.1
2020-06-03	23.8	11.3	16	4.2
2020-06-04	25	10.8	18.3	0
2020-06-05	22.5	12.7	15.8	9
2020-06-06	26.3	11.5	19.2	0
2020-06-07	28.5	15	22.5	0
2020-06-08	21.3	12.7	16.3	0
2020-06-09	24.7	13	18.8	9
2020-06-10	25	14.2	18.3	6
2020-06-11	27.5	13.3	19.5	0
2020-06-12	28.3	14	21.3	0
2020-06-13	30.3	15.5	23	0
2020-06-14	28.3	16.3	20.8	0
2020-06-15	24	15.2	18.5	1.7
2020-06-16	20.8	15.5	18	3.5
2020-06-17	25.5	15.2	19	1.5
2020-06-18	25.5	16.3	20	0
2020-06-19	26.5	14.5	20.8	0
2020-06-20	23.8	13.5	17.5	0.1
2020-06-21	19.2	13.5	16.3	0
2020-06-22	26.3	16.5	20.8	0
2020-06-23	26.3	14.5	21	0
2020-06-24	26.7	13.8	20.5	0
2020-06-25	27.5	14	21.5	6
2020-06-26	29.5	14.8	22.8	0
2020-06-27	31.5	16.5	25	0
2020-06-28	34	18	26.3	0
2020-06-29	32	14.8	20.8	11.6
2020-06-30	30	13.3	21.3	0
2020-07-01	34	17.5	26.3	0
2020-07-02	31.7	18.3	25.8	0
2020-07-03	27	18.3	21.7	0
2020-07-04	30.5	17	23.3	0
2020-07-05	31.5	16.5	25	0
2020-07-06	34.2	14.8	25.8	4.5
2020-07-07	24.5	11.5	18	0
2020-07-08	28	11.3	20.3	0
2020-07-09	31.5	13.8	23.5	0
2020-07-10	34.2	18	26.7	0
2020-07-11	33.5	12.5	22.2	5.5
2020-07-12	25	10.5	18	0
2020-07-13	27.2	10.2	19.5	0
2020-07-14	27.5	13.5	20.3	0
2020-07-15	28.8	13	21.5	0
2020-07-16	27.5	14	21	10
2020-07-17	23.5	13	16.3	1
2020-07-18	22.2	13	17	0
2020-07-19	26.5	14.2	19.8	1.2
2020-07-20	29.7	14.8	22.5	0
2020-07-21	33.3	15.2	23.5	8
2020-07-22	30.8	17	24	0
2020-07-23	31	16.7	23.8	0
2020-07-24	28.8	16.3	21	40.7
2020-07-25	23.3	15.8	18.3	10
2020-07-26	28.8	16	22.8	0
2020-07-27	30.5	18.3	24	0
2020-07-28	32.2	17.3	25.5	0
2020-07-29	34.2	20.8	27.5	0
2020-07-30	34	22.5	27.8	0
2020-07-31	34	20.5	27.8	0
2020-08-01	32.5	19.2	26	0
2020-08-02	31.3	18.5	24.5	0
2020-08-03	29.5	17	23.3	21.5
2020-08-04	26.3	13.5	18.8	10.5
2020-08-05	18.8	13.3	16	0.4
2020-08-06	28.8	16.5	22.2	2
2020-08-07	32.5	22.5	16.7	0
2020-08-08	35.8	20	28	0
2020-08-09	33.3	19	26.5	0
2020-08-10	33.3	19	26.3	0
2020-08-11	33.8	17.7	23.5	3
2020-08-12	32	17	24.5	0
2020-08-13	32.2	18.5	25.3	3
2020-08-14	27.8	17.7	22	0
2020-08-15	28.8	17.3	22	14
2020-08-16	26	18	21	6.5
2020-08-17	31.3	16.7	23.5	9.4
2020-08-18	24.5	16.5	19.8	2.5
2020-08-19	28	14.5	21.3	0
2020-08-20	29.5	16	23	0
2020-08-21	31	16.3	24.5	0
2020-08-22	33.5	18.3	26.3	0
2020-08-23	27.5	18.3	22.2	0.1
2020-08-24	27	18.8	21.7	0
2020-08-25	27.2	16	21.5	0
2020-08-26	29.5	12.3	21.7	0
2020-08-27	29.2	17.3	23	0
2020-08-28	31.5	17.5	24	0
2020-08-29	34.2	18.5	26.3	6
2020-08-30	34.5	18.5	25	0
2020-08-31	22.2	13	17.5	18.5
2020-09-01	19.2	11.3	14.8	0
2020-09-02	23	10	16.3	0
2020-09-03	23	11	17.5	0
2020-09-04	26.3	11	19	0
2020-09-05	28.5	12.3	20.5	0
2020-09-06	31.5	14.8	21.5	0
2020-09-07	24	13.8	17.7	0
2020-09-08	26	12.3	18.5	0
2020-09-09	27.5	10.2	19.5	0
2020-09-10	29	13.3	21	0
2020-09-11	29.7	14.5	22.2	0
2020-09-12	31.5	17	23.3	0
2020-09-13	32.5	14.8	23.8	0
2020-09-14	32.8	15	23.8	0
2020-09-15	32.5	19	24.7	0
2020-09-16	31.5	19	24.2	0
2020-09-17	29.2	15	22.5	0
2020-09-18	22.5	10.8	16.3	0
2020-09-19	24	11.5	17	0
2020-09-20	27.5	12.3	18.8	0
2020-09-21	28.5	14.5	20.3	0
2020-09-22	29	15	20.3	0
2020-09-23	27.5	13.3	19.5	0
2020-09-24	27.5	13.3	19.5	0
2020-09-25	24.5	11	17.3	19
2020-09-26	16.7	6.5	10.2	0
2020-09-27	19.5	5	13	3.9
2020-09-28	18.5	10.2	12.5	6.5
2020-09-29	18.3	7.8	12.3	0
2020-09-30	16.3	11.3	13.8	0.8
2020-10-01	19.8	9.5	13.8	0
2020-10-02	23	8.8	15.8	0
2020-10-03	26.5	15	20.3	33.5
2020-10-04	21.7	11.5	16	0
2020-10-05	21.5	11	15.2	0
2020-10-06	22.8	10	15.2	0
2020-10-07	13.3	10.2	11.5	2.7
2020-10-08	20.3	8	13	0
2020-10-09	21.7	7.3	13.3	0
2020-10-10	21.3	10	14	0
2020-10-11	13.3	5.5	10	22.4
2020-10-12	7.3	3.8	5.8	4.7
2020-10-13	7.3	3.8	5.7	12.6
2020-10-14	17.7	5.5	9.8	0
2020-10-15	9.3	7	7.8	9.3
2020-10-16	10.8	5.5	7.3	0.3
2020-10-17	12	4.3	7.3	0
2020-10-18	16	3.8	8.8	0
2020-10-19	16.7	4.5	9	0
2020-10-20	17.5	5	10	0
2020-10-21	19	5.8	11.7	0
2020-10-22	18.8	6.8	11.5	0
2020-10-23	20.8	6	12.5	0
2020-10-24	14.5	7.3	11.5	0
2020-10-25	13.8	9.5	11.3	0
2020-10-26	19.8	7.8	13.3	0
2020-10-27	21.7	10.2	13.5	0
2020-10-28	17.7	5.8	11.3	0
2020-10-29	11.7	5.3	8.5	2
2020-10-30	16.3	6.8	10.5	0.3
2020-10-31	19.2	9.8	13	0
2020-11-01	18.8	9	12	0
2020-11-02	18.8	9	12.3	0
2020-11-03	17	11.3	13.3	0
2020-11-04	12.3	9.3	11	1
2020-11-05	10	6.3	8.3	0
2020-11-06	16.5	1	7.5	0
2020-11-07	15.8	0.3	6.8	0
2020-11-08	8.5	3.3	5.8	0
2020-11-09	8.3	2.8	5.8	0
2020-11-10	8	4.3	6.5	0
2020-11-11	6.3	4.8	5.5	0
2020-11-12	7.3	4	5.5	0
2020-11-13	6.3	3	5.3	0.3
2020-11-14	6.5	5	6	0.1
2020-11-15	9.3	6.3	7.5	0
2020-11-16	8	4.8	6.5	3.5
2020-11-17	16.5	3	9.3	0
2020-11-18	15.8	2.5	7.3	0
2020-11-19	7.8	3.5	5.8	1
2020-11-20	7.8	0	5.3	0
2020-11-21	7.8	-2.5	1.8	0
2020-11-22	8.3	-5.3	0.3	0
2020-11-23	8.5	-2.3	2.5	0
2020-11-24	8.5	-0.5	3.5	0
2020-11-25	2.5	-0.3	1.5	0
2020-11-26	1.5	0	0.8	0
2020-11-27	0.3	-1.8	-0.5	0
2020-11-28	-0.3	-1.8	-1.3	0
2020-11-29	6.5	-1.5	1.5	0
2020-11-30	6.8	-2.8	1.5	0
2020-12-01	2.5	-4.5	-2	0
2020-12-02	-1.5	-3.3	-2.3	2
2020-12-03	0.5	-1.8	-0.8	5.1
2020-12-04	2.8	-0.3	1.3	0.8
2020-12-05	10	2	5.8	0
2020-12-06	9	5	6.8	0.2
2020-12-07	8.3	2.5	5	0
2020-12-08	3.8	0.8	2.3	0
2020-12-09	3.8	0.8	2.3	16.2
2020-12-10	2.8	0.3	1.5	1.5
2020-12-11	1.5	0.5	1	0.3
2020-12-12	2.3	0.5	1	0
2020-12-13	3.5	1.8	2.5	0
2020-12-14	5.3	2	3.3	0
2020-12-15	3	1	2	0
2020-12-16	2.3	1	1.5	0
2020-12-17	2.3	1.5	1.8	0.5
2020-12-18	1.5	-0.3	0.5	0.3
2020-12-19	1	-0.3	0.8	0.2
2020-12-20	2.3	1	1.5	0.6
2020-12-21	2.8	1.5	2	0.2
2020-12-22	4.3	1.8	3	0.8
2020-12-23	12.5	4	7.5	0
2020-12-24	12.5	4.8	7.8	20
2020-12-25	5.3	2.3	3.8	2
2020-12-26	4.8	-3.8	0.8	0
2020-12-27	-0.3	-4	-1.8	0.2
2020-12-28	7.5	-1.3	2.5	1.4
2020-12-29	12.3	3	6	6
2020-12-30	7.3	3.3	4.8	0.2
2020-12-31	4.5	-1.3	2.3	0

## Sheet: 2021
Date	Temperature			Rainfall
	Max.	Min.	Mean
2021-01-01	9.3	-2.8	2.5	0
2021-01-02	5.3	2.5	4	1.2
2021-01-03	8.3	2	4	0
2021-01-04	3.5	2	2.5	0
2021-01-05	4	1.3	2.8	3.5
2021-01-06	6.8	1	2.8	1
2021-01-07	1.8	-2.5	-0.3	0.3
2021-01-08	1.5	-0.3	0.8	3
2021-01-09	-1.3	-4.5	-3	0
2021-01-10	-2	-5	-3	1
2021-01-11	0	-5	-2.8	0
2021-01-12	-1.8	-6.5	-4	0
2021-01-13	6.5	-3.3	0.5	0
2021-01-14	4.5	-3	-0.5	0.2
2021-01-15	2	-3	-1	0
2021-01-16	-0.5	-5.5	-3.3	2
2021-01-17	-3	-6.5	-5	0
2021-01-18	-1.3	-7.8	-3.8	0
2021-01-19	4	-4.3	-0.3	0
2021-01-20	8.3	1.8	5	0
2021-01-21	11.7	4.5	7.5	0
2021-01-22	12.5	5.8	8.8	0.2
2021-01-23	12	2.3	7.3	3.2
2021-01-24	8	2	3.8	0
2021-01-25	6	0	2.3	0
2021-01-26	6	-1.8	1	0.2
2021-01-27	5.5	-2.8	0.3	0
2021-01-28	5.3	-4.8	0.5	0.3
2021-01-29	7.3	1.8	4.5	0.2
2021-01-30	10	0.8	4.5	6.5
2021-01-31	0.8	-3.3	-1.5	1.5
2021-02-01	4	-6.8	-2.3	0
2021-02-02	0	-3	-1.3	0
2021-02-03	10.2	-1	4.8	0
2021-02-04	17	4.8	10	0
2021-02-05	10.8	3.5	7	0
2021-02-06	6.8	2.8	4	0
2021-02-07	2.8	1	1.8	0.6
2021-02-08	5.5	0	2.3	7.6
2021-02-09	2.5	-1.3	0.8	6.5
2021-02-10	4.3	-2.5	1.3	8.5
2021-02-11	-2.8	-7.3	-5.5	0
2021-02-12	-2.3	-10	-6.5	0
2021-02-13	-0.5	-10.5	-5.8	0
2021-02-14	0.3	-6.8	-3.5	0
2021-02-15	3.8	-6	-2	0
2021-02-16	1.8	-4	-1	0
2021-02-17	5.8	-1.5	1.3	0
2021-02-18	12.5	0.5	5.5	0
2021-02-19	8.5	0	3.8	0
2021-02-20	9	1.3	4	0
2021-02-21	7.5	0.8	3.5	0
2021-02-22	14	0	6.5	0
2021-02-23	13.5	0	6.3	0
2021-02-24	18.3	-0.8	8.5	0
2021-02-25	20.5	3.5	11.7	0
2021-02-26	17.5	2.8	10	0
2021-02-27	13.3	2.8	6.8	0
2021-02-28	11.3	1.3	5	0
2021-03-01	12	-1.8	5.8	0
2021-03-02	13.3	-1.8	5.5	0
2021-03-03	15.5	-1.3	6.8	0
2021-03-04	14.8	0.8	7.3	0
2021-03-05	9	0	4.8	0.7
2021-03-06	6.5	-2.8	1.3	0
2021-03-07	8.3	-5	1.8	0
2021-03-08	10.2	-1.3	4	0
2021-03-09	4.5	-0.5	2	0
2021-03-10	7.3	-0.3	3.3	0
2021-03-11	9.5	-3	4.5	1.2
2021-03-12	12.7	4.5	7.5	1
2021-03-13	12.7	2.5	7.8	0
2021-03-14	9.5	4.3	6.3	3
2021-03-15	10.2	2.8	6	0
2021-03-16	11.3	2	5	0
2021-03-17	9.3	1	4.3	0
2021-03-18	7.3	-0.5	2.8	0
2021-03-19	5.8	-3.3	1.8	0
2021-03-20	7.3	-3	1.3	0
2021-03-21	7.3	-4	0.8	0.1
2021-03-22	8	-0.5	3.3	0
2021-03-23	10	-0.8	4.5	0
2021-03-24	11.7	2.5	6.3	0
2021-03-25	11.7	1.8	6.5	0
2021-03-26	17	0.5	9.5	0
2021-03-27	19.2	5.3	11.5	2
2021-03-28	12.7	4.3	8.5	0
2021-03-29	16.7	2	9.5	0
2021-03-30	21.5	8.8	14.2	0
2021-03-31	22	9	15.5	0
2021-04-01	24	8.8	17	0
2021-04-02	18.8	9.8	14.5	0
2021-04-03	12.7	3.3	8	0.1
2021-04-04	12	1.8	5.3	0
2021-04-05	14	0.5	8	0
2021-04-06	8.3	-1	3	0
2021-04-07	8	-3.8	1.8	0
2021-04-08	9.8	-1	4.5	0
2021-04-09	14.5	-1.3	7.8	0
2021-04-10	18.3	4.3	11	0
2021-04-11	15.5	7.3	11.3	0
2021-04-12	20	3.3	10.2	3
2021-04-13	3.5	0.3	1.8	17.5
2021-04-14	8.5	1	3.8	0.2
2021-04-15	9.8	1.5	4.8	0
2021-04-16	9.8	-1.5	5.3	0
2021-04-17	8.5	1.8	6.3	0
2021-04-18	10.2	4.5	6.3	9
2021-04-19	7.8	5.3	6.3	10.8
2021-04-20	11.7	5	8	3.8
2021-04-21	18.5	3.3	11	0
2021-04-22	18	6.5	10.8	5.5
2021-04-23	15	4	10	0
2021-04-24	16.3	3.8	10.8	0
2021-04-25	19	6.5	12.3	0
2021-04-26	11.7	4	7.3	0.6
2021-04-27	14.5	3.8	9	0
2021-04-28	15	6.5	10.2	0
2021-04-29	21	9.3	14.5	1.2
2021-04-30	22.2	11.5	16.7	0.2
2021-05-01	25	13.5	19	1.5
2021-05-02	21.5	8.5	13.8	1.5
2021-05-03	14.8	6.5	10.5	0
2021-05-04	20	4.8	13.3	0
2021-05-05	20.8	6.5	13.3	4
2021-05-06	11.7	7	9.3	0
2021-05-07	10.8	4.8	9.3	13.5
2021-05-08	16.3	3.8	10.5	0
2021-05-09	21	6.8	14.8	0
2021-05-10	26	11	18.8	0
2021-05-11	28.3	13.5	21.5	0
2021-05-12	19.8	12.7	16	1.3
2021-05-13	18.8	10.2	13	3
2021-05-14	20	10.5	14	0
2021-05-15	20	10	15	0
2021-05-16	20.5	11	15	0
2021-05-17	14.2	9.8	12.3	2.6
2021-05-18	20.8	9	15.5	0
2021-05-19	14	9	10.8	9.2
2021-05-20	18.5	8.5	12.5	3
2021-05-21	21.3	8.3	16	0
2021-05-22	20.3	12.5	14.5	0
2021-05-23	17.3	9.3	12	7.2
2021-05-24	16.3	7.3	12.3	1.6
2021-05-25	14.8	8.8	12.3	0
2021-05-26	21.3	5.8	13.8	0
2021-05-27	22	9.8	16	0
2021-05-28	21.3	10.2	15.2	0.4
2021-05-29	20	11.3	15	0.6
2021-05-30	19.5	9.8	13.3	1.6
2021-05-31	21	8.5	14	0.6
2021-06-01	21	10	15.5	0
2021-06-02	24	8.3	17	0
2021-06-03	25	13	19	0
2021-06-04	27	12.5	20.8	0
2021-06-05	29.2	14.8	22.2	0
2021-06-06	24.2	17	19.8	1.4
2021-06-07	27.8	13.8	20.8	0.7
2021-06-08	29	15	22	2.5
2021-06-09	29	17.5	23.8	0
2021-06-10	28.8	17.3	22.5	0
2021-06-11	28.8	17	22	0
2021-06-12	28.3	17.3	22.5	5
2021-06-13	23.5	12.3	18.8	0
2021-06-14	24.2	10.2	17.7	0
2021-06-15	28	13.3	20.8	0
2021-06-16	31.3	15.5	23.8	0
2021-06-17	32.5	16.7	25.3	0
2021-06-18	32.5	20	25.8	0
2021-06-19	34.7	18.3	27	0
2021-06-20	34.5	21	27.2	0
2021-06-21	35.3	21.7	28	0
2021-06-22	35.5	19.2	27.5	0
2021-06-23	34.5	18.3	26.7	0
2021-06-24	36.5	24.5	30	0
2021-06-25	33.5	17.7	25.3	0.5
2021-06-26	30.8	17.3	24	0
2021-06-27	32	17	24.7	0
2021-06-28	36	18.3	27.5	0
2021-06-29	36.5	20.8	29	0
2021-06-30	33.3	16	25.5	0
2021-07-01	29	15.2	20.5	0.3
2021-07-02	24.7	13.3	19.2	0
2021-07-03	31	14.5	22	0
2021-07-04	26.7	16	22	1.5
2021-07-05	30.3	16.7	22.5	1.6
2021-07-06	33.8	15.8	25.8	0
2021-07-07	36.7	20.8	29	0
2021-07-08	39.2	20	30.3	0
2021-07-09	35.5	20.8	28	0
2021-07-10	32.2	19.2	25.5	0
2021-07-11	28.5	18.5	24	1.5
2021-07-12	30.8	17	24	0
2021-07-13	36.5	19.5	28.5	0
2021-07-14	31.1	22	27.1	0.1
2021-07-15	31	17	24.5	0
2021-07-16	32.5	17	25.8	3
2021-07-17	29.5	16.3	21.5	20
2021-07-18	30.8	18.5	22.8	0
2021-07-19	27.5	18	20.5	2.8
2021-07-20	27.5	17	21.5	0
2021-07-21	28	15.2	22	0
2021-07-22	29.7	17	23	0
2021-07-23	30.3	15.2	22.5	0
2021-07-24	31.7	14.8	24.5	0
2021-07-25	34	19.2	27	0
2021-07-26	34.7	20.3	27.5	0
2021-07-27	34	20.8	26.7	0
2021-07-28	35.3	20	27.5	0
2021-07-29	33.5	18.5	26	0
2021-07-30	35.3	20.8	28	15.2
2021-07-31	31	17.5	23	4.7
2021-08-01	30.4	17.1	22.9	17.6
2021-08-02	27.2	15.8	21	0
2021-08-03	29.2	17	22.5	0
2021-08-04	26.7	17.3	22.2	0.4
2021-08-05	21.5	14.2	18.3	5.5
2021-08-06	27.2	13.8	20.5	0
2021-08-07	30.5	15.2	24	0
2021-08-08	30.3	19.2	24.2	0
2021-08-09	30	17.5	23.3	0
2021-08-10	32.5	18	25.5	0
2021-08-11	33.8	19	26	0
2021-08-12	33.3	18.5	26	0
2021-08-13	34.7	20.5	26.7	0
2021-08-14	35.8	19.2	27.5	0
2021-08-15	36.7	20.3	27.8	0.3
2021-08-16	35.7	18.5	26.7	2
2021-08-17	23.3	13.8	17.5	0.4
2021-08-18	26.5	14	19.5	0
2021-08-19	28.3	13.8	20.3	0
2021-08-20	30.8	16.3	22.5	0
2021-08-21	31.5	17	24.2	0
2021-08-22	33	19	25.5	0
2021-08-23	23.3	14.2	17	5.5
2021-08-24	25.8	13	18.8	0.1
2021-08-25	23.5	11.3	15.2	0
2021-08-26	25	9.3	16.7	20
2021-08-27	22	11	15.2	0
2021-08-28	22.5	10.5	15.2	8
2021-08-29	21	11.7	16	0
2021-08-30	23.8	10.2	17.3	0.2
2021-08-31	24.5	10.2	17.5	0
2021-09-01	22.5	13.5	17.3	0
2021-09-02	25.8	13.5	18.8	0
2021-09-03	26	10.2	18.3	0
2021-09-04	28	10.8	19.5	0
2021-09-05	26.5	13	19.5	0
2021-09-06	26.3	13.3	18.3	0
2021-09-07	29.5	11.3	19.8	0
2021-09-08	28.8	14	20.5	0
2021-09-09	28.8	14	20.3	0
2021-09-10	28	12.5	20	0
2021-09-11	29.7	11	20.8	0
2021-09-12	30.8	13.8	22.2	0
2021-09-13	31.3	14.8	22.2	0
2021-09-14	31.5	14.5	22.2	0
2021-09-15	31.5	16.3	23.5	0
2021-09-16	31	16.3	22.8	0
2021-09-17	20.3	12	16.7	3.4
2021-09-18	23.3	10.2	16.5	0
2021-09-19	20.2	9.5	13.8	0
2021-09-20	17.7	7.5	11	10.6
2021-09-21	20.3	9.3	13.8	0
2021-09-22	16	9	11.5	0.8
2021-09-23	20.5	9.3	14.2	0
2021-09-24	24.7	8	16.7	0
2021-09-25	26.7	11.7	18.3	0
2021-09-26	27.5	12	19.2	0
2021-09-27	19.8	13.3	16.3	1.8
2021-09-28	24.5	13.5	17.3	0
2021-09-29	20	12	15.5	0.4
2021-09-30	19.5	8.3	13.5	1.2
2021-10-01	18.3	6.3	12.7	0
2021-10-02	22.2	9.3	14.5	0
2021-10-03	24.2	8.5	16.3	0
2021-10-04	26.5	11.7	18.8	0
2021-10-05	26.3	13.3	18.8	0.4
2021-10-06	14.8	9.3	12.3	15.2
2021-10-07	12.5	9.3	10.5	25.4
2021-10-08	13.5	8.5	11	0
2021-10-09	14.8	6	10.2	0
2021-10-10	8.3	4.8	6.8	2.2
2021-10-11	12.5	8	10.2	0
2021-10-12	17	5.3	9.8	0
2021-10-13	13.5	3.8	7.3	0.4
2021-10-14	14.8	3	8	0
2021-10-15	16.5	1.3	6.8	0
2021-10-16	17	3.5	10	0
2021-10-17	17.7	3.5	9.3	0
2021-10-18	17	2.8	8.5	0
2021-10-19	19.2	3	10	0
2021-10-20	20.3	5.8	13.3	0
2021-10-21	19.5	10	14	0.2
2021-10-22	13.8	8	10.5	8.2
2021-10-23	16.3	6.8	10	0
2021-10-24	17	2	8.5	0
2021-10-25	16	1.3	8.3	0
2021-10-26	13.5	3.5	7	0
2021-10-27	17.5	3	9	0
2021-10-28	17.3	1.8	7.8	0
2021-10-29	16	4	8.3	0
2021-10-30	16	1.3	7.8	0
2021-10-31	15	4.5	9	0
2021-11-01	13.1	4.5	9.8	0
2021-11-02	12.3	3.3	7.3	12.8
2021-11-03	14.8	2.5	9.3	1
2021-11-04	19.5	5	11.7	10.4
2021-11-05	13.3	3.8	8.5	0
2021-11-06	16.3	3	9.3	0
2021-11-07	14.2	6.3	8.3	1.6
2021-11-08	10	3.5	6.8	6.4
2021-11-09	16	3.5	8	0
2021-11-10	8.5	1.5	4.8	0
2021-11-11	5.8	2.8	4.3	0
2021-11-12	10	2.5	4.8	0
2021-11-13	5.8	2.5	4.3	0
2021-11-14	7.5	2	4.8	0.2
2021-11-15	11.3	1.8	6	0
2021-11-16	13	4.3	7	0
2021-11-17	6.3	3.3	5	0
2021-11-18	13.3	3.5	6.8	0
2021-11-19	12.3	3.5	6.5	0
2021-11-20	15	2.3	8.5	0
2021-11-21	11.7	0.5	3.3	0
2021-11-22	8.5	0	4.5	0.4
2021-11-23	7.8	-3	2.8	0
2021-11-24	10.2	-3.5	2	0
2021-11-25	7	0	3	0
2021-11-26	3.3	-1.3	1.5	14
2021-11-27	5.3	-2.8	1.8	0.4
2021-11-28	5.8	1.5	3.5	2
2021-11-29	6	-3	1.3	0
2021-11-30	6.5	-4.5	1.5	0
2021-12-01	11.5	3.3	6.5	0
2021-12-02	7.5	3.3	5	21.8
2021-12-03	7	-2.3	2	0.2
2021-12-04	3.3	-4.3	-0.8	0
2021-12-05	2.3	-0.5	0.5	8.2
2021-12-06	4	-0.8	1	0.6
2021-12-07	4	-2.5	-0.3	0
2021-12-08	6	-4.5	0.5	0
2021-12-09	0	-1	-0.5	10.4
2021-12-10	2.3	-3.5	-1	0
2021-12-11	2.5	-1	0.5	0
2021-12-12	5	-0.3	1.5	0.6
2021-12-13	5.5	0.5	2.8	0
2021-12-14	7	0.3	3.3	0
2021-12-15	5.8	1	4.3	0
2021-12-16	7.3	3	5.5	0
2021-12-17	8.5	3	5.3	0
2021-12-18	7.5	2	3.8	0
2021-12-19	9.3	1.3	4.5	0
2021-12-20	6.8	0.3	2.8	0
2021-12-21	5	-1.5	0.3	0
2021-12-22	3.3	-5.5	-2.3	0
2021-12-23	0.3	-5.5	-2	0
2021-12-24	9	-1.3	4.8	0
2021-12-25	11.5	0.3	6.3	0
2021-12-26	0.3	-2.5	-1.3	1.4
2021-12-27	0.3	-3.8	-1.8	0.2
2021-12-28	-0.5	-2.8	-1.5	1.4
2021-12-29	5	-1.3	1.3	1.4
2021-12-30	6.3	0	3.5	0
2021-12-31	12.5	2.3	6.5	0

[truncated: 1 more sheets: 2022]
